# Supplementary material for: A benzimidazolyl terpyridine-Fe2+system and its recognition driven molecular model of a traffic light
Source: Royal Society of Chemistry journal article supplement (doi:10.1039/c8dt03690j), 2018-11-27
Supplement: c8dt03690j1.pdf [file c8dt03690j1.pdf]

## Electronic Supporting Information

### **Benzimidazolyl terpyridine-Fe<sup>2+</sup> system and its recognition driven molecular model of a traffic light**

Avinash Kumar Sonkar<sup>a</sup>, Abhishek Rai<sup>a</sup>, Kamini Tripathi<sup>a</sup>, Pooja Sharma<sup>b</sup>, H. W.

Roesky<sup>\*c</sup> Michael G.B. Drew<sup>d</sup> and Lallan Mishra<sup>\*a</sup>

<sup>a</sup>Department of Chemistry, Institute of Science, Banaras Hindu University, Varanasi - 221005, UP, India,

<sup>b</sup>Department of Chemistry, Guru Nanak Dev University, Amritsar-143005, Punjab, India

<sup>c</sup>Institute of Inorganic Chemistry, University of Göttingen Tammannstrasse 4, 37077 Göttingen, (Germany)

<sup>d</sup>Department of Chemistry, University of Reading, Whiteknights, Reading RG6 6AD, UK

E-mail: lmishrabhu@yahoo.com

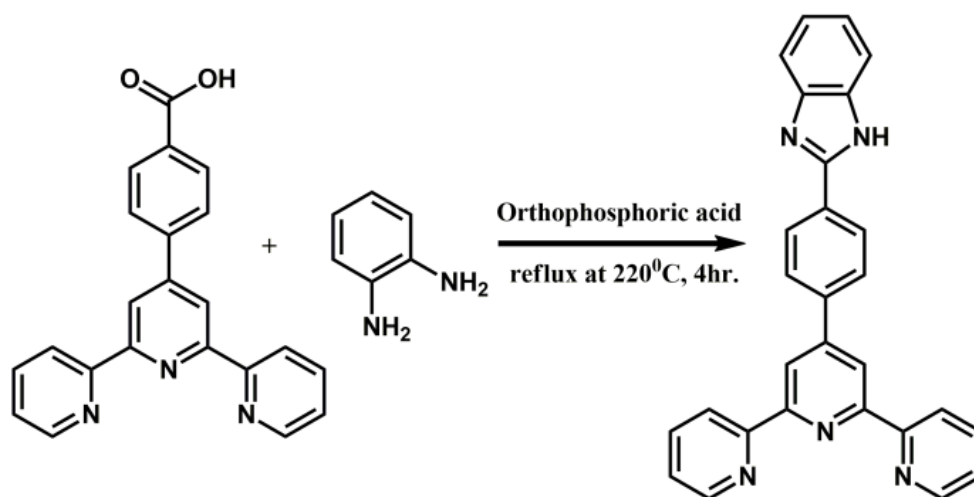

**Scheme S1:**Synthetic procedure for **BIT**.

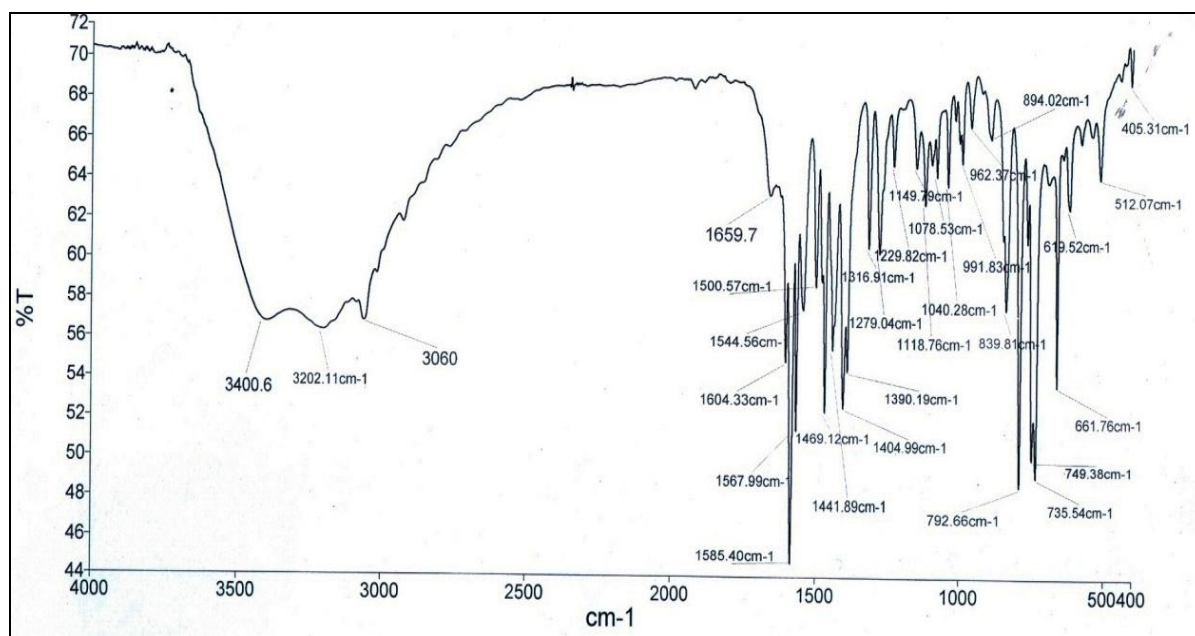

**Fig. S1:**IR spectrum of **BIT**.

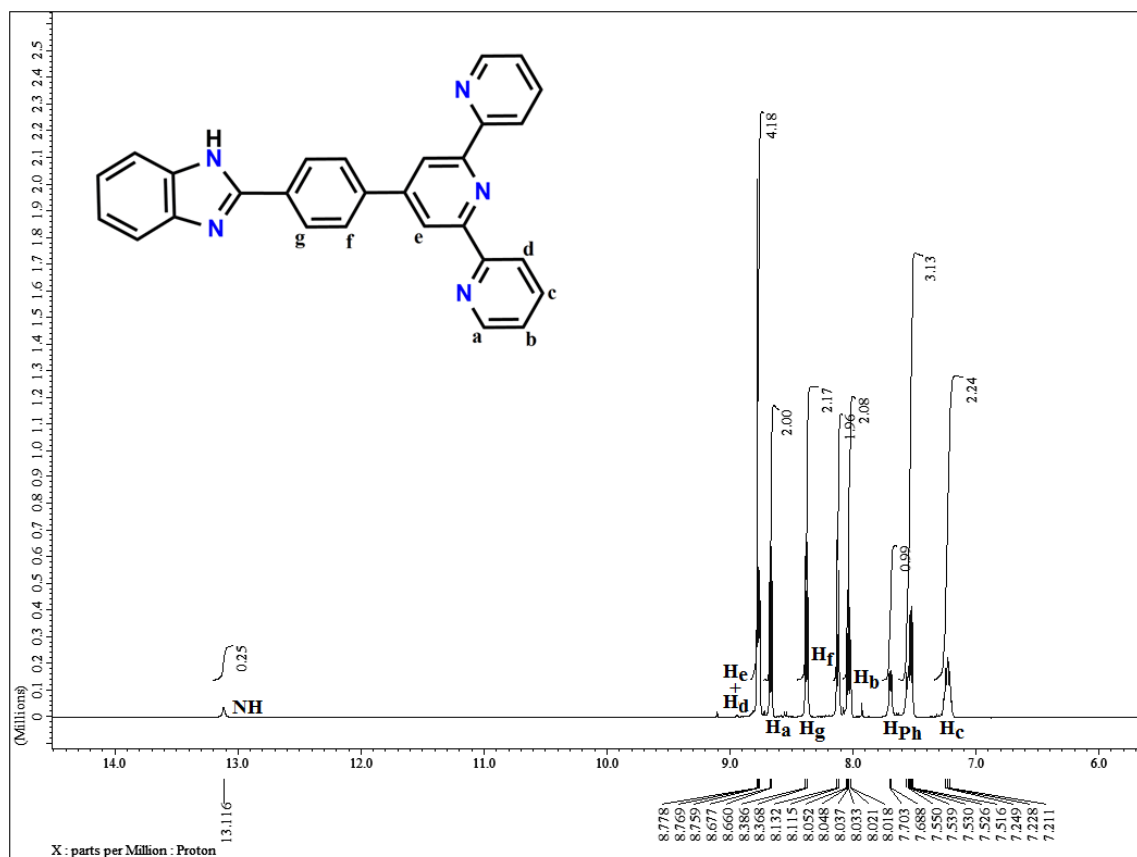

Fig. S2:  $^1\text{H}$  NMR spectrum of BIT in DMSO- $d_6$  at room temperature.

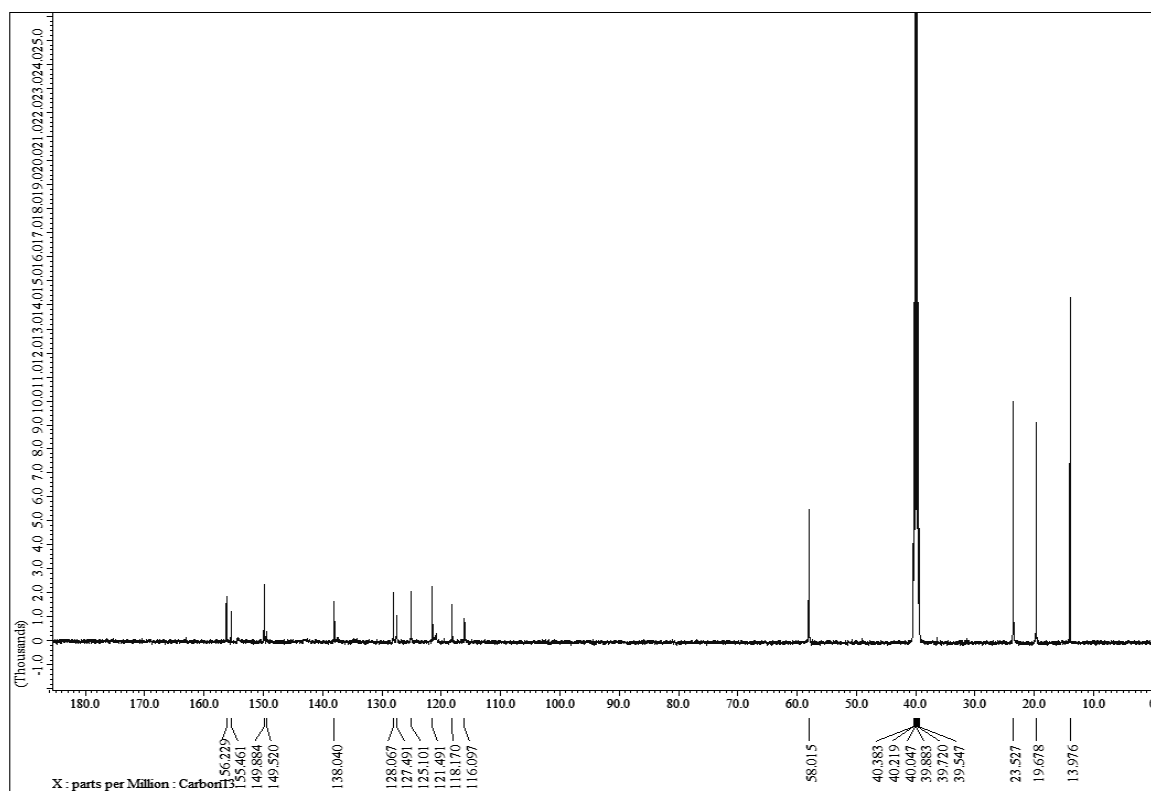

Fig. S3:  $^{13}\text{C}$  NMR spectrum of BIT in DMSO- $d_6$  at room temperature.

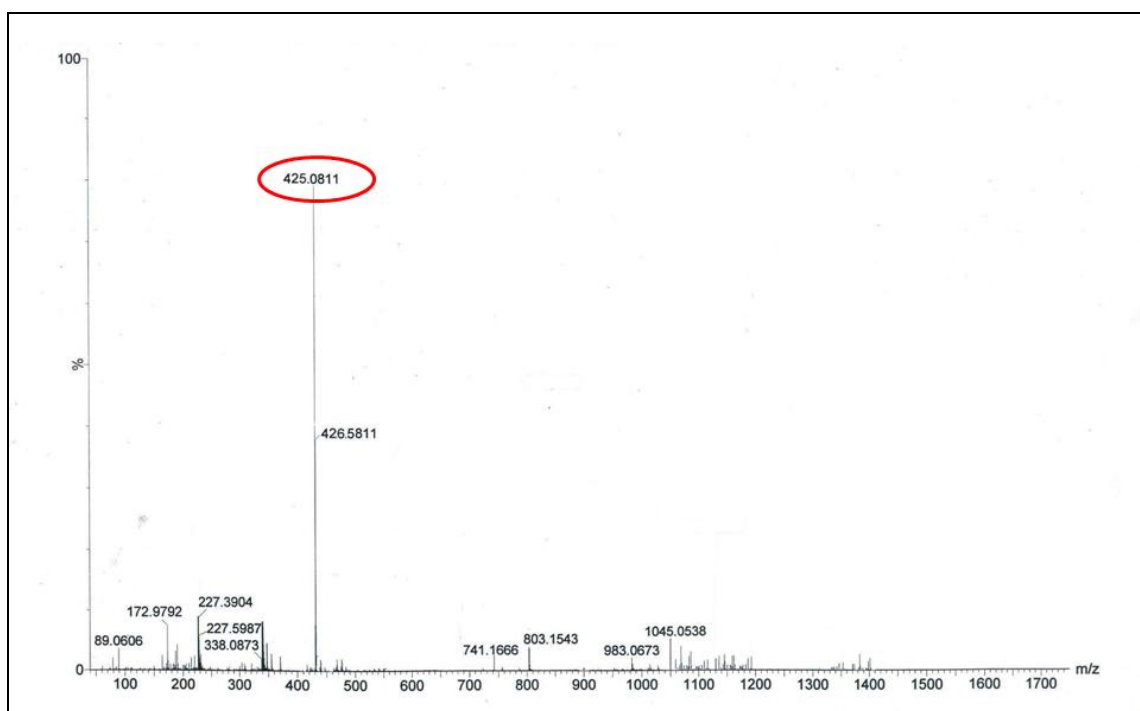

Fig. S4:HRMS spectrum of BIT.

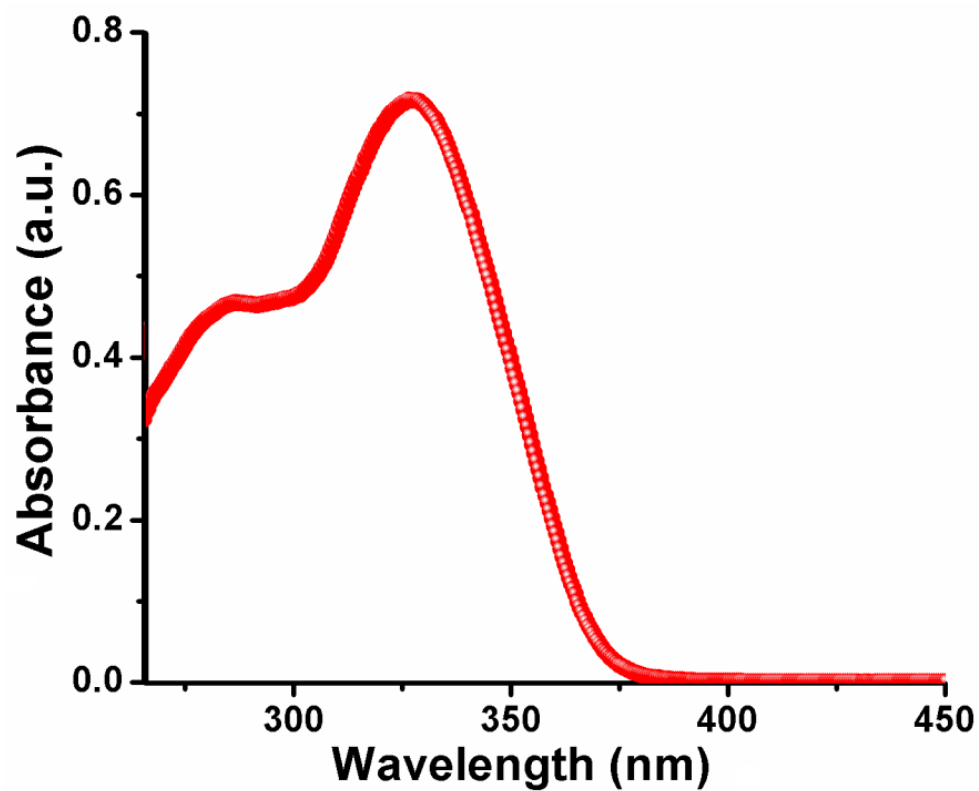

Fig. S5:UV-vis spectrum of BIT ( $2.0 \times 10^{-5}$  M, DMF-H<sub>2</sub>O-acetonitrile, 0.5 : 0.5 : 9, v/v, HEPES buffer, pH 7.2) at room temperature.

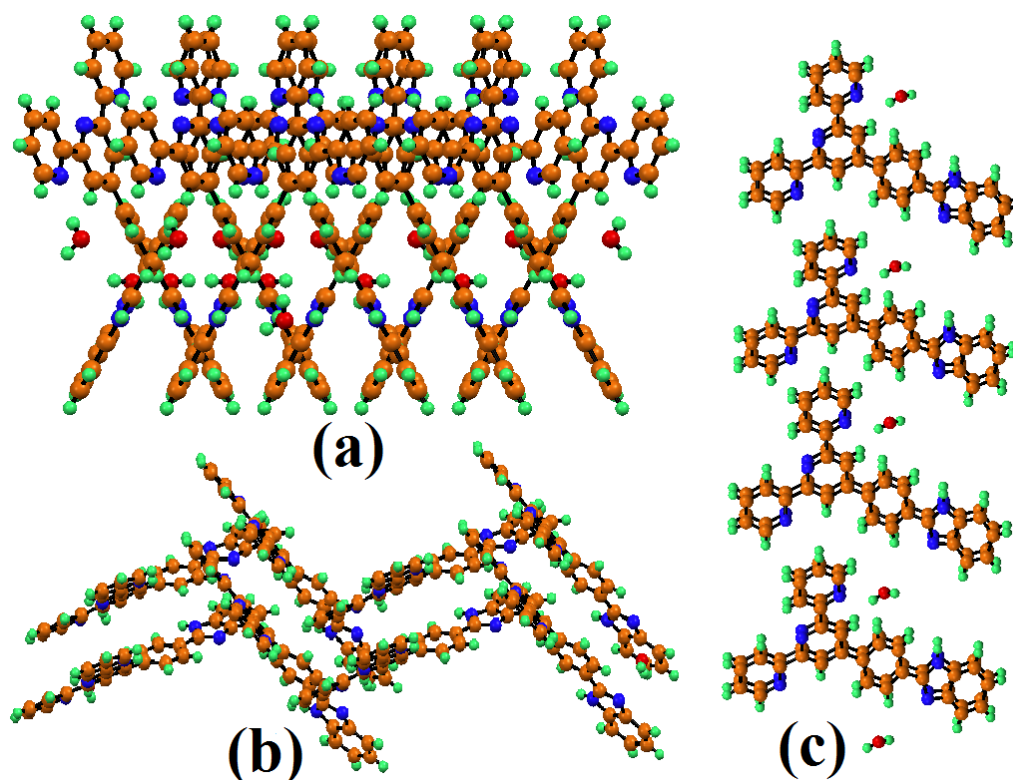

**Fig. S6:**Supramolecular architectures of **BIT** along a(i), b(ii) and c(iii) crystallographic axes, respectively.

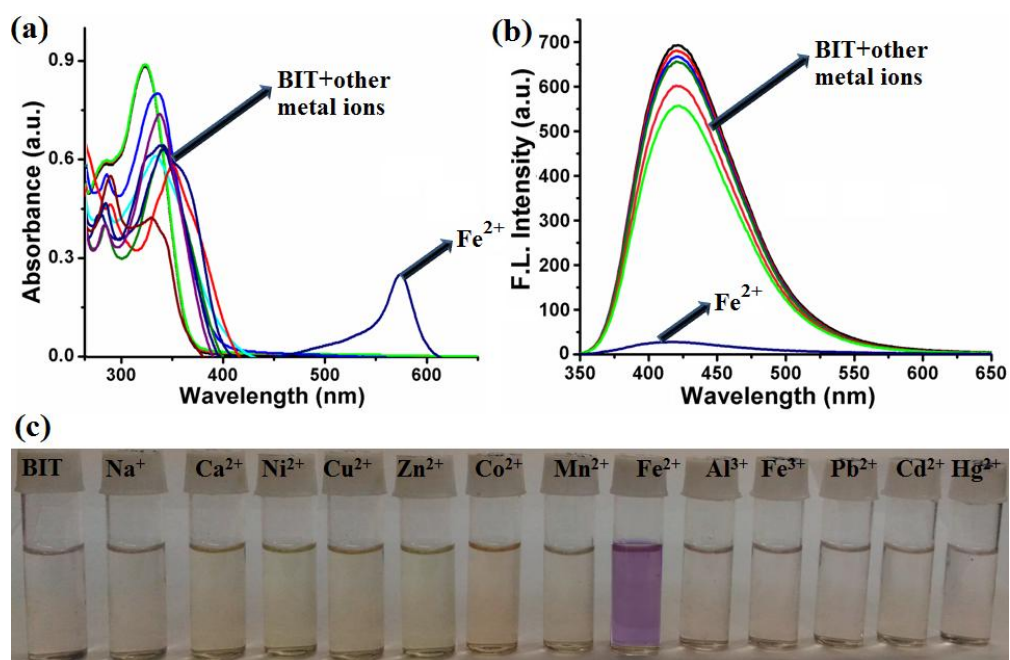

**Fig. S7:**Changes in (a) UV-vis, (b) Fluorescence spectra and (c) visual colour in solution of **BIT** ( $2.0 \times 10^{-5}$  M, DMF- $\text{H}_2\text{O}$ -acetonitrile, 0.5 : 0.5 : 9, v/v, HEPES buffer, pH 7.2) upon the addition of 2 equiv. of different metal ions as their perchlorate salt ( $1.0 \times 10^{-2}$  M in  $\text{H}_2\text{O}$ ).

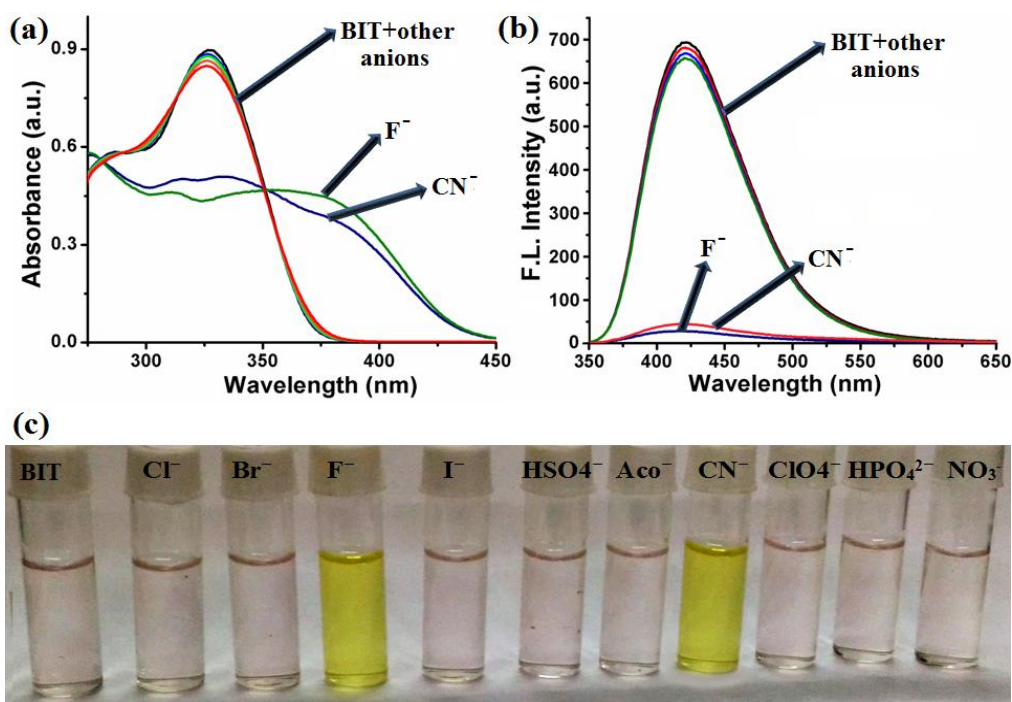

**Fig. S8:** Changes in (a) UV-vis, (b) Fluorescence spectra and (c) visual colour in solution of BIT ( $2.0 \times 10^{-5}$  M, DMF-H<sub>2</sub>O-acetonitrile, 0.5 : 0.5 : 9, v/v, HEPES buffer, pH 7.2) upon the addition of 10 equiv. of different anions as their TBA salt ( $1.0 \times 10^{-2}$  M in acetonitrile)

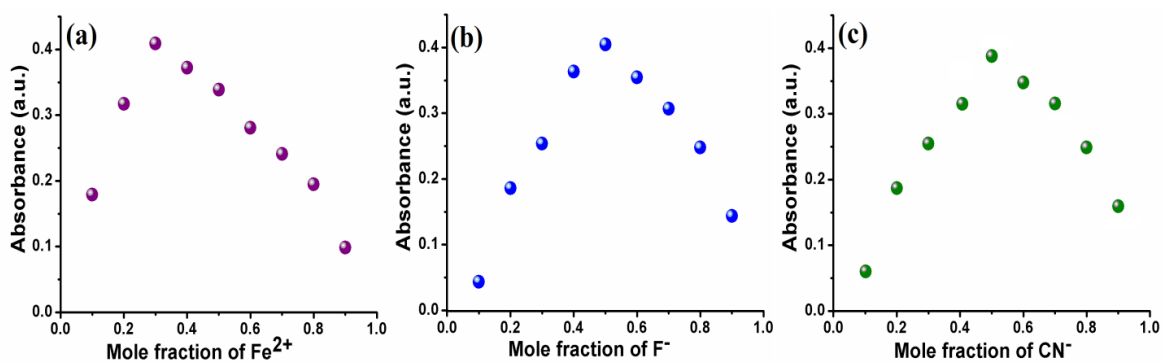

**Fig. S9:** Job's plot obtained for BIT ( $2.0 \times 10^{-5}$  M, DMF-H<sub>2</sub>O-acetonitrile, 0.5 : 0.5 : 9, v/v, HEPES buffer, pH 7.2) on variation of its absorbance vs mole-fraction of Fe<sup>2+</sup> ( $1.0 \times 10^{-3}$  M in H<sub>2</sub>O) at  $\lambda_{\max} = 579$  nm (a), F<sup>-</sup> ( $1.0 \times 10^{-2}$  M in acetonitrile) at  $\lambda_{\max} = 381$  nm (b), and CN<sup>-</sup> ( $1.0 \times 10^{-2}$  M in acetonitrile) at  $\lambda_{\max} = 383$  nm (c).

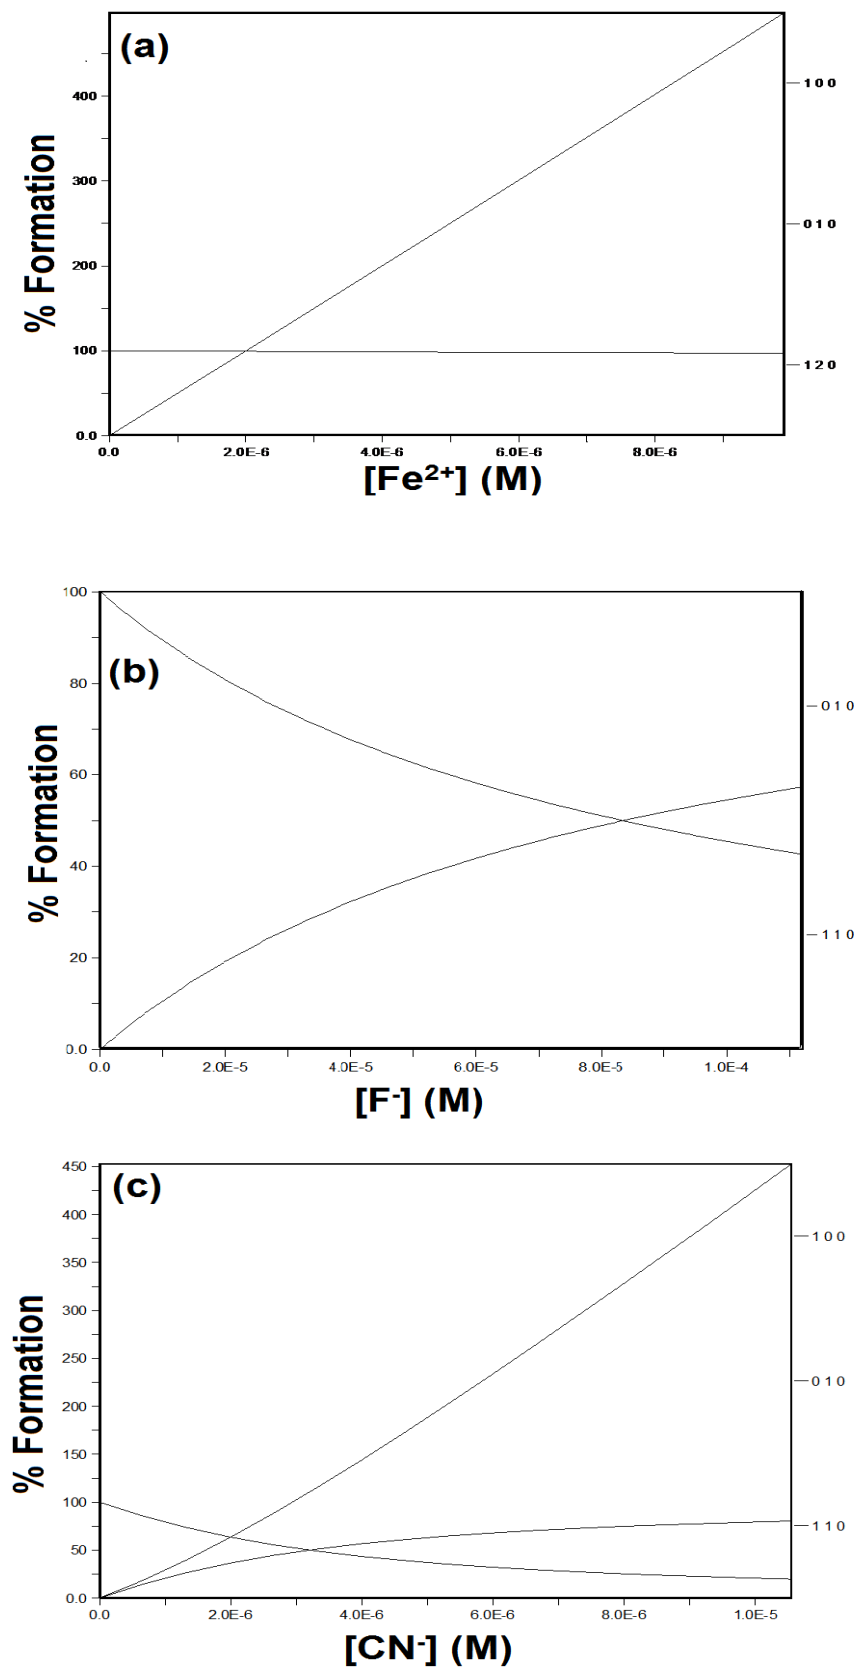

**Fig. S10:** Fitting diagram for the binding of **BIT** with  $\text{Fe}^{2+}$  (a),  $\text{F}^-$  (b) and  $\text{CN}^-$  (c) ions obtained using SPECFIT software.

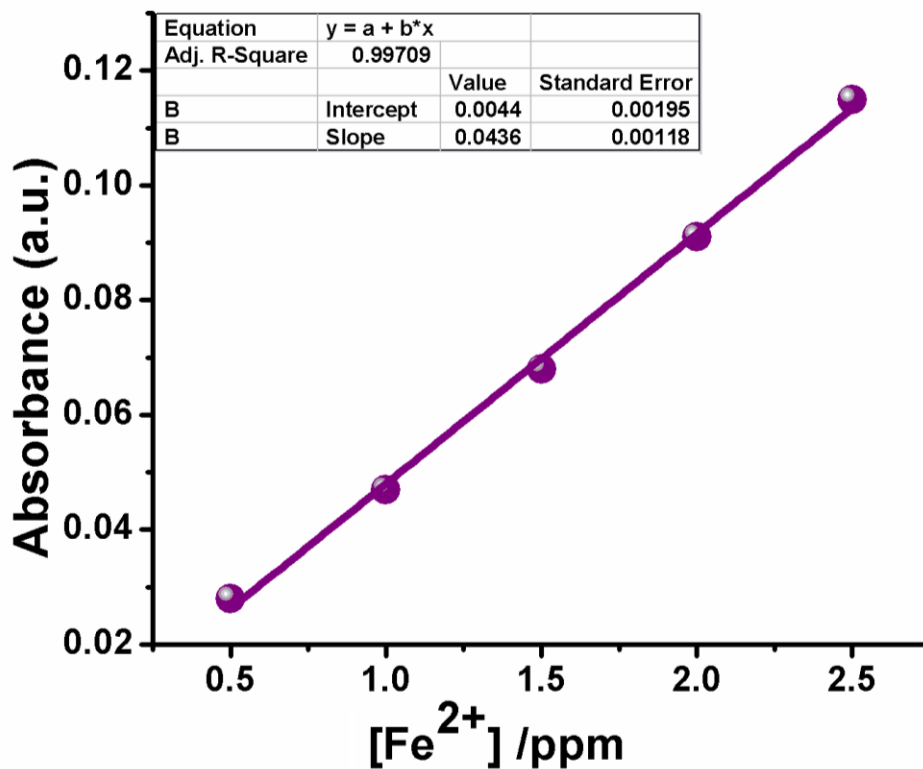

**Fig.S11:**Graph showing the variation of absorbance of BIT ( $2.0 \times 10^{-5}$  M, DMF-H<sub>2</sub>O-acetonitrile, 0.5 : 0.5 : 9, v/v, HEPES buffer, pH 7.2) vs [Fe<sup>2+</sup>] ( $R^2 = 0.985$ ) at low concentration level used for the determination of detection limit  $\lambda_{\max}$  579nm.

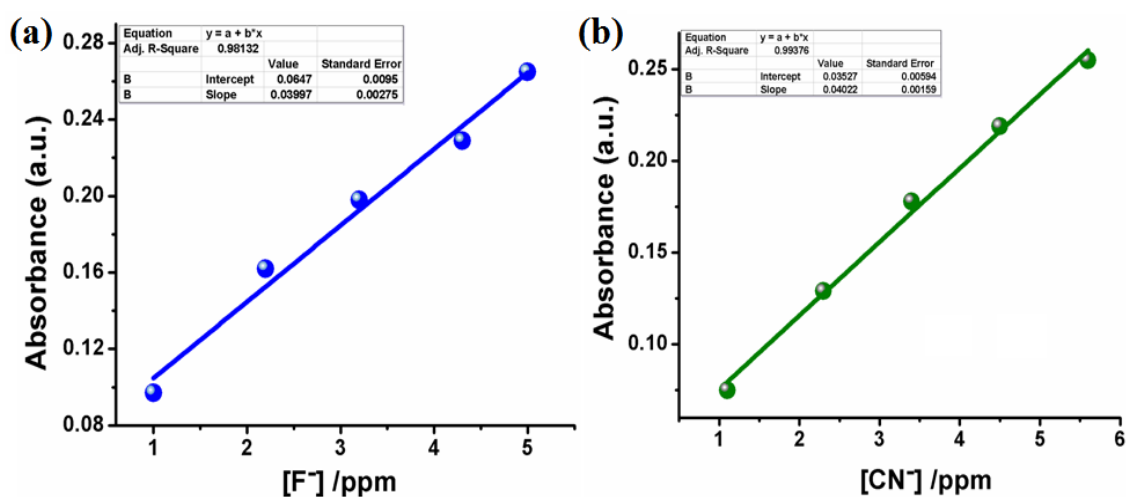

**Fig. S12:**Graph showing the variation of absorbance BIT ( $2.0 \times 10^{-5}$  M, DMF-H<sub>2</sub>O-acetonitrile, 0.5 : 0.5 : 9, v/v, HEPES buffer, pH 7.2) vs (a) [F<sup>-</sup>] ( $R^2 = 0.986$ ) and (b) [CN<sup>-</sup>] ( $R^2 = 0.992$ ) at low concentration level used for the determination of detection limit at  $\lambda_{\max}$  381 and 383 nm, respectively.



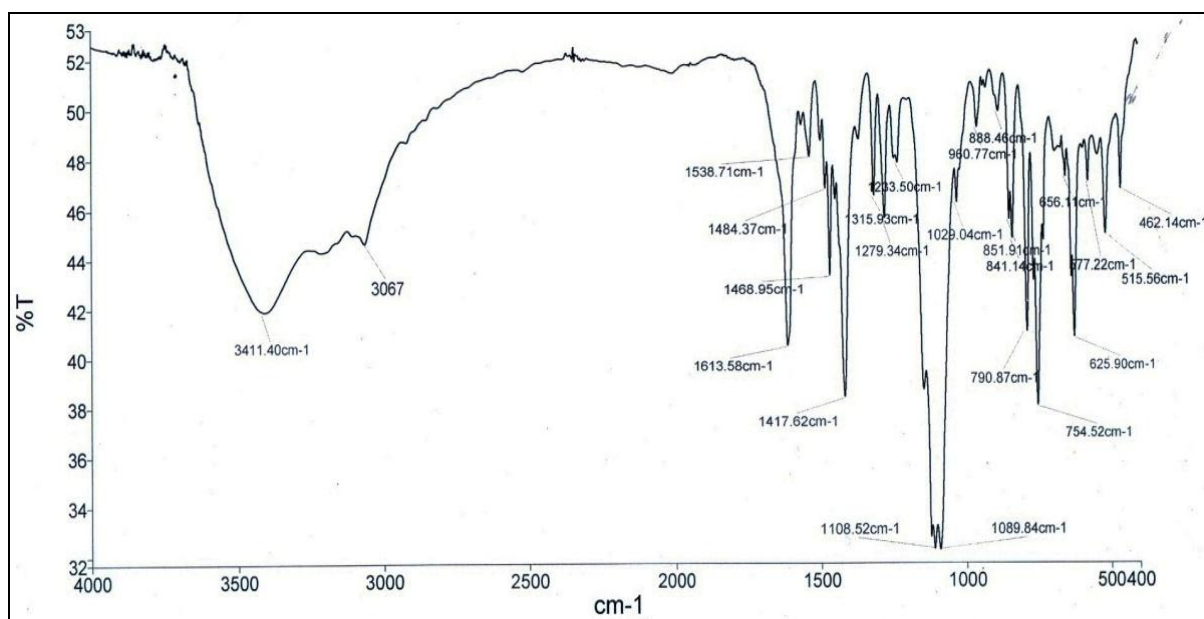

Fig. S13: IR spectrum of complex 1.

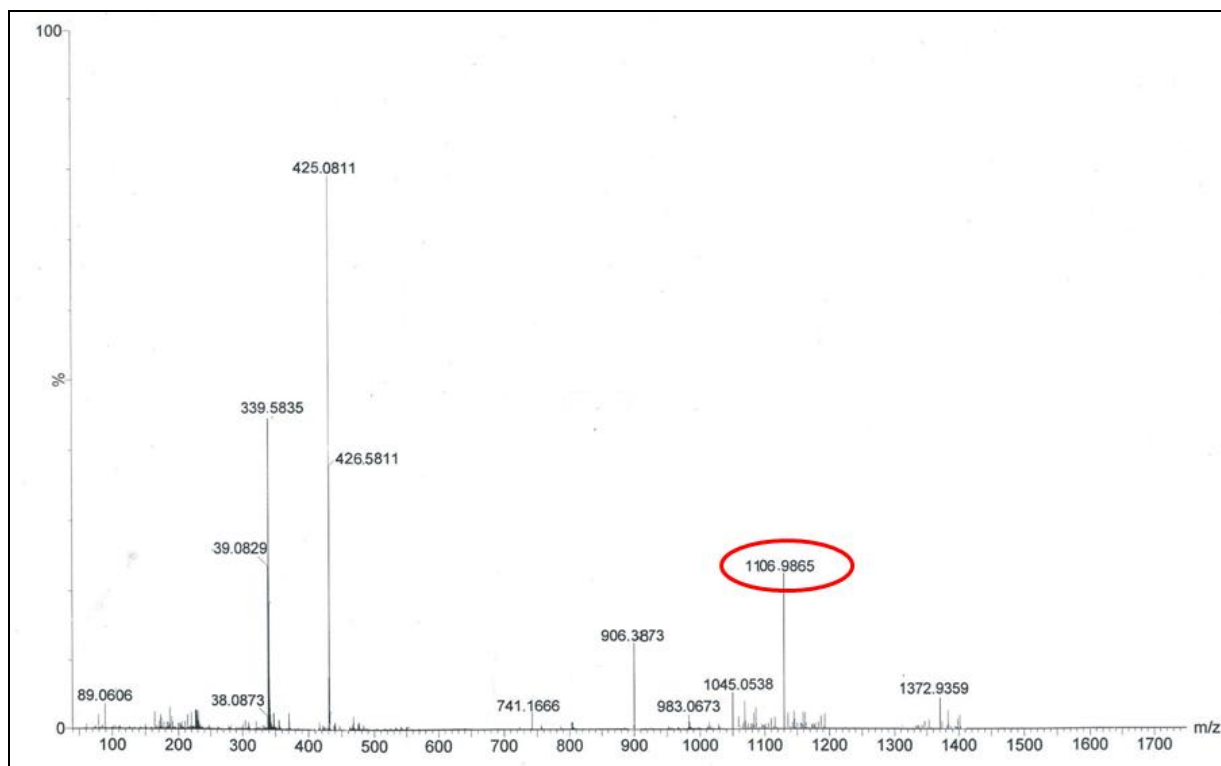

Fig. S14: HRMS spectrum of complex 1.

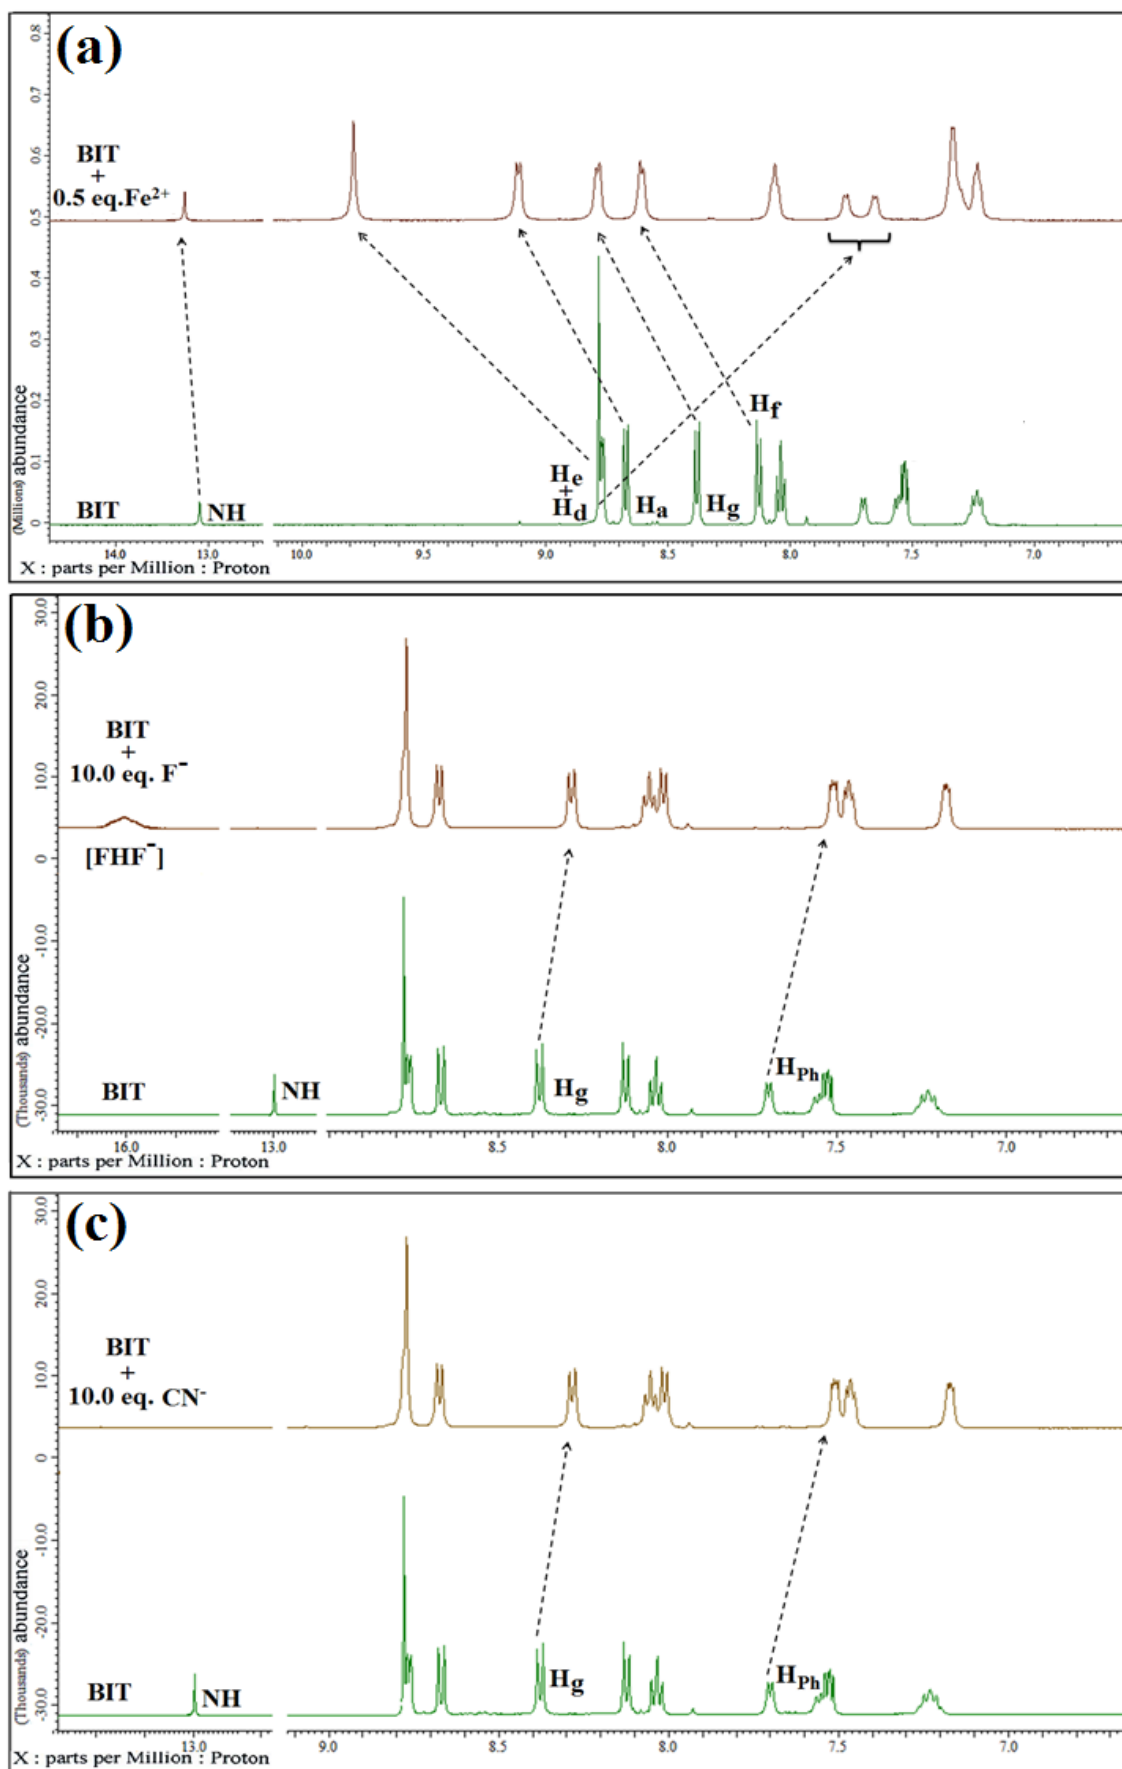

**Fig. S15:** Partial  $^1\text{H}$  NMR spectra of **BIT** before and after the addition of  $\text{Fe}^{2+}$  (a),  $\text{F}^-$  (b) and  $\text{CN}^-$  (c) ions in  $\text{DMSO-}d_6$ .

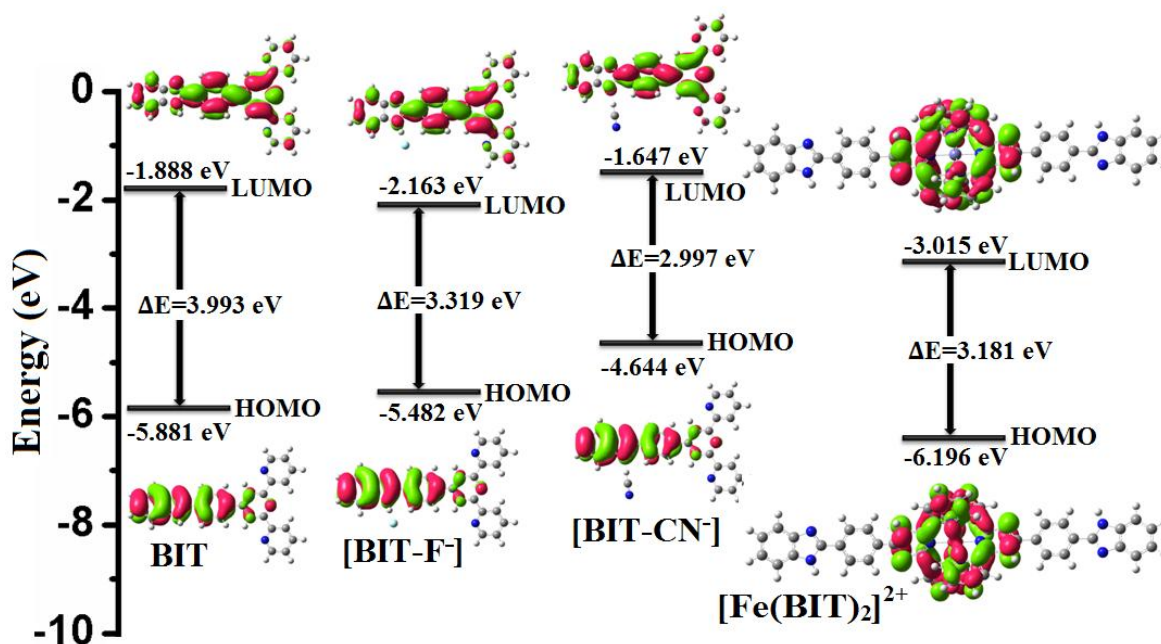

Fig. S16: Energy level diagrams of BIT, [BIT-F]<sup>-</sup>, [BIT-CN]<sup>-</sup>, and [Fe(BIT)<sub>2</sub>]<sup>2+</sup> calculated at DFT level in acetonitrile (using a B3LYP/6-31G\*\* and LANL2DZ basis set).

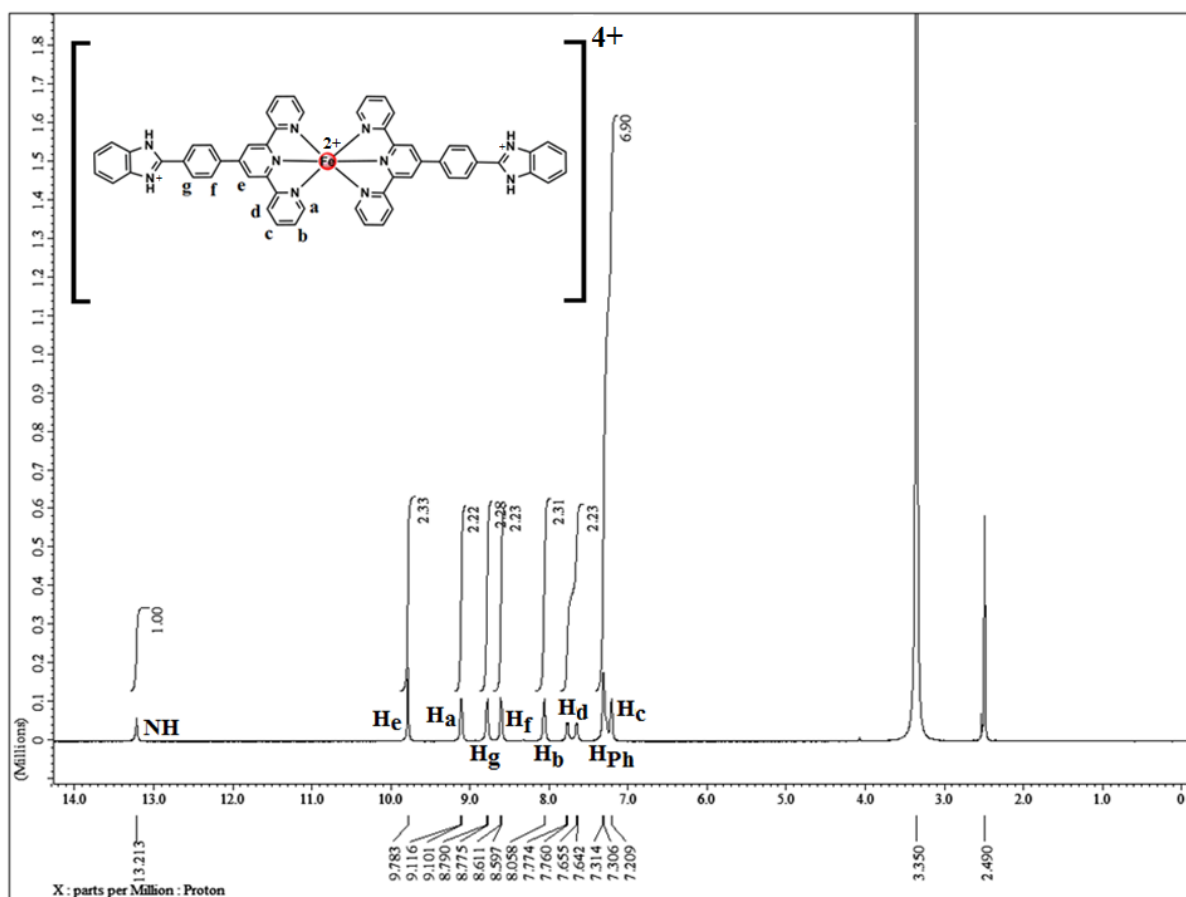

Fig. S17: <sup>1</sup>H NMR spectrum of complex1 recorded in DMSO-d<sub>6</sub> at room temperature.

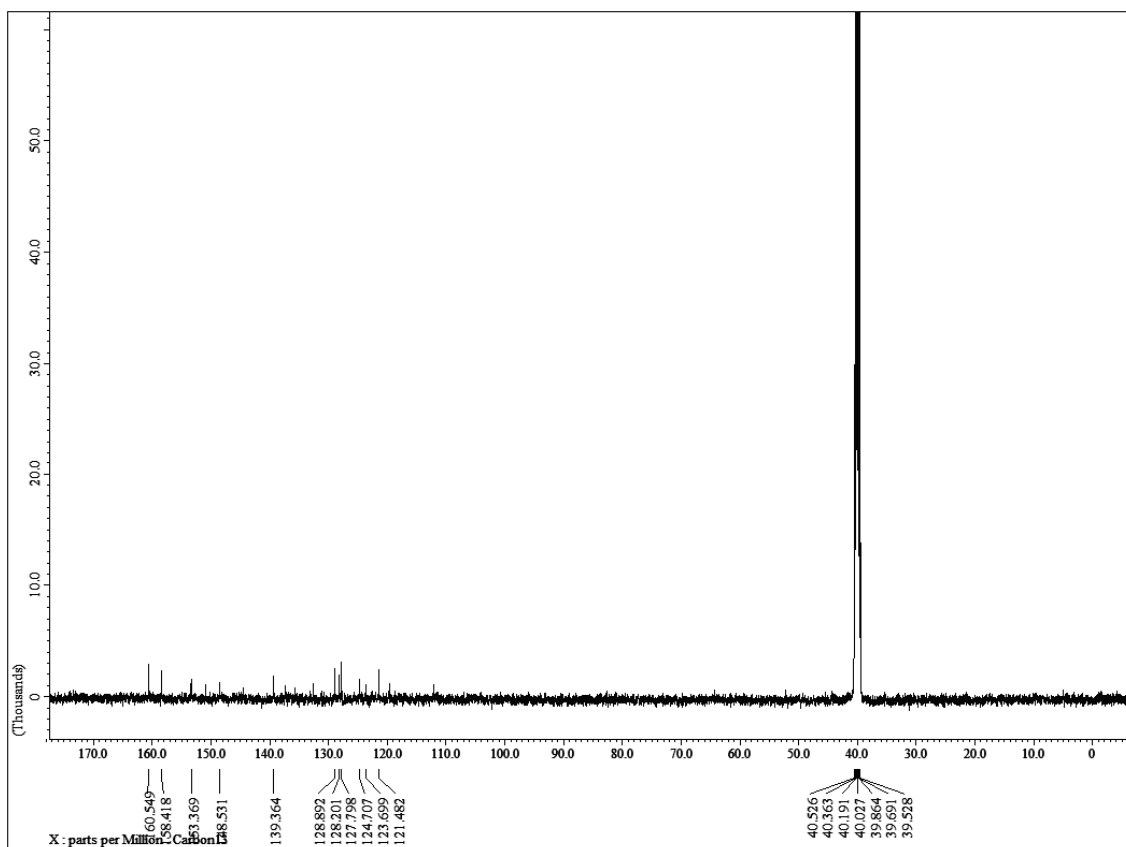

**Fig S18:** <sup>13</sup>C NMR spectrum of complex1 recorded in DMSO-*d*<sub>6</sub> at room temperature.

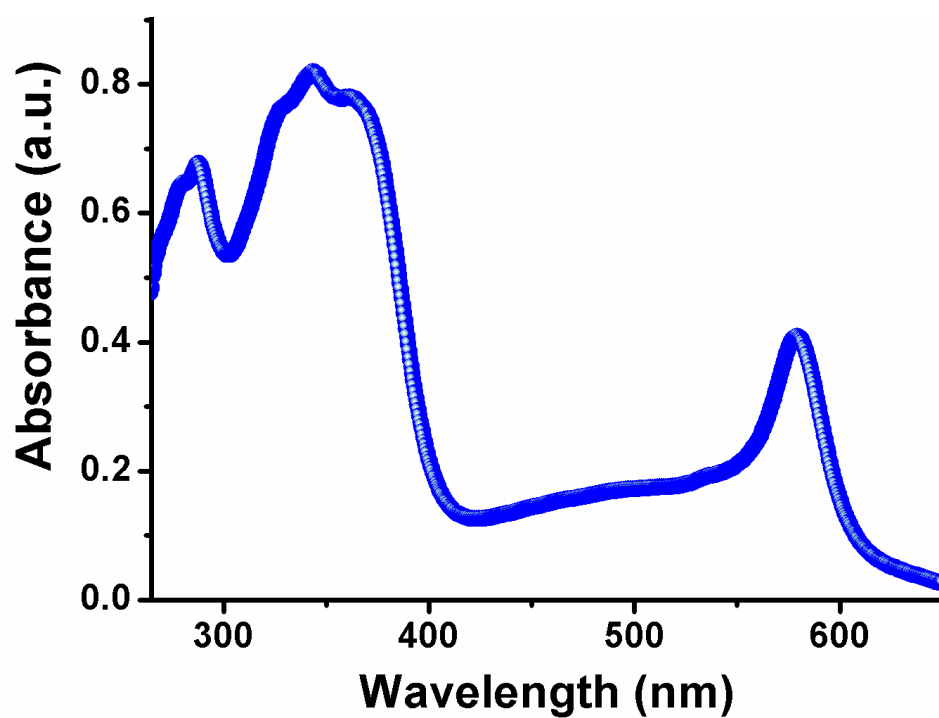

**Fig. S19:** UV-vis spectrum of complex1 (2.0 x 10<sup>-5</sup> M, DMF-H<sub>2</sub>O-acetonitrile, 0.5 : 0.5 : 9, v/v, HEPES buffer, pH 7.2) at room temperature.



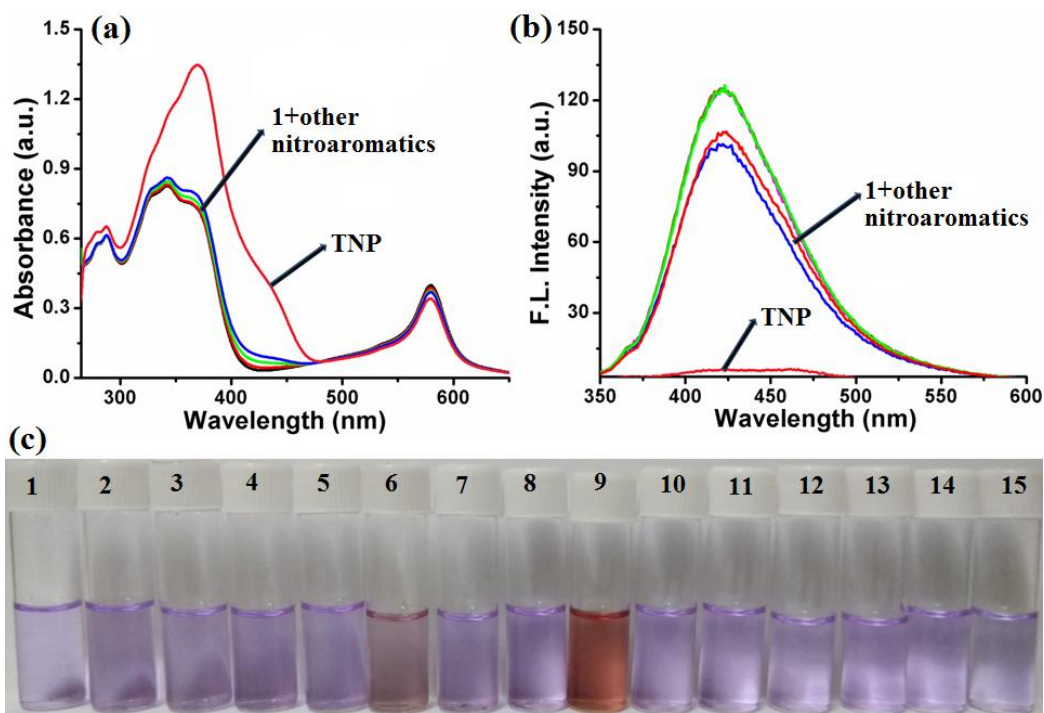

**Fig. S22:** Changes in (a) UV-vis, (b) Fluorescence spectra and (c) visual colour change of complex1 ( $2.0 \times 10^{-5}$  M, DMF-H<sub>2</sub>O-acetonitrile, 0.5 : 0.5 : 9, v/v, HEPES buffer, pH 7.2) upon the addition of different nitroaromatics ( $1.0 \times 10^{-2}$  M in MeOH) along with carboxylate ( $1.0 \times 10^{-2}$  M in acetonitrile) and phosphate ( $1.0 \times 10^{-2}$  M in acetonitrile). (1=none, 2=4-nitrobenzene, 3=1,3-dinitrobenzene, 4=4-nitrotoluene, 5= 2,4-dinitrotoluene, 6=DNP (2,6-dinitrophenol), 7=phenol, 8=4-nitrophenol (NP) 9=2,4,6-trinitrophenol (TNP), 10=2,4,6-trinitrotoluene (TNT), 11=4-methoxyphenol (MP), 12=tetrabutylammonium acetate (TBAAc), 13=benzoic acid (BA), 14=tetrabutylammonium phosphate (TBAPO), 15=tributylammonium pyrophosphate (TBAPy) .

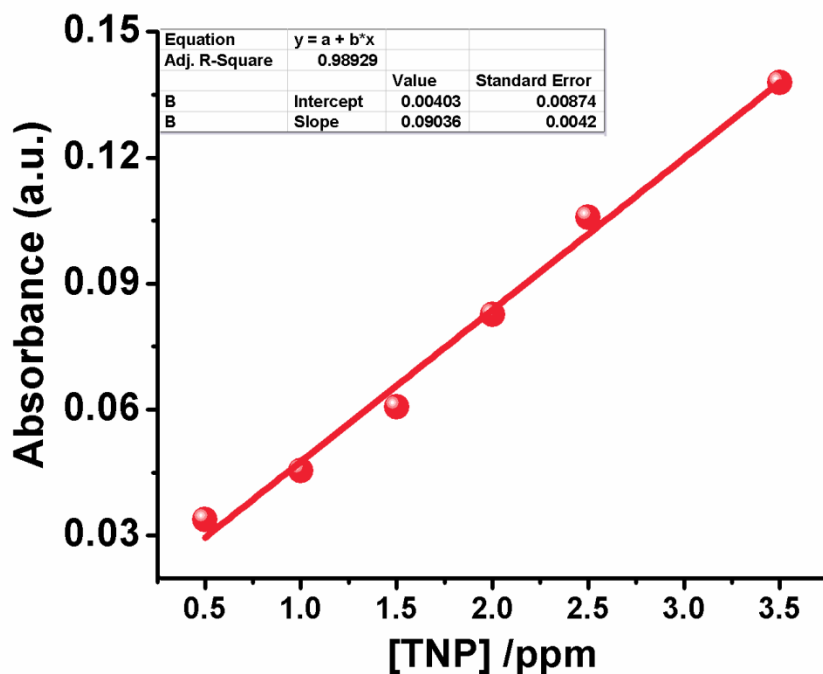

**Fig. S23:** Graph showing the variation of absorbance for complex1 ( $2.0 \times 10^{-5}$  M, DMF-H<sub>2</sub>O-acetonitrile, 0.5 : 0.5 : 9, v/v, HEPES buffer, pH 7.2) vs [TNP] at low concentration level ( $R^2 = 0.986$ ) used for the determination of detection limit at  $\lambda_{\max}$  425nm.

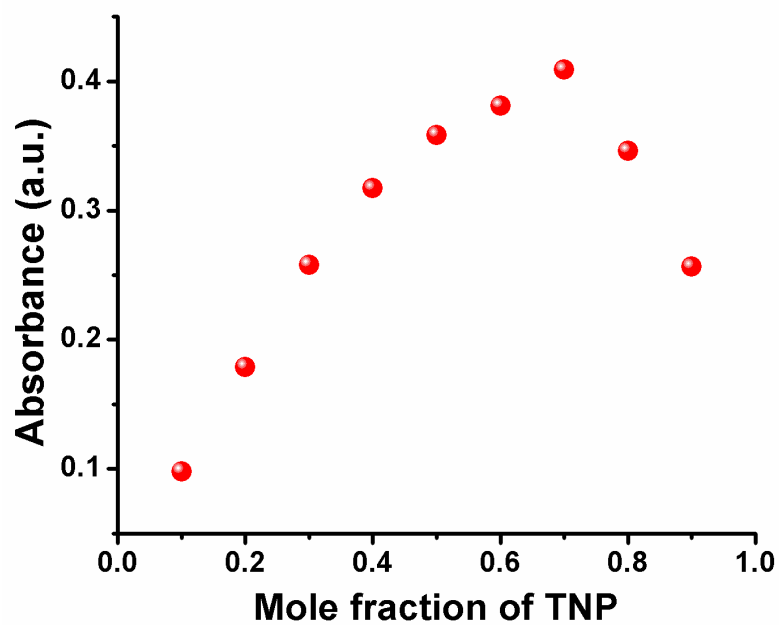

Fig. S24: Job's plot showing the variation of absorbance of complex 1 at  $\lambda_{\max} = 425$  nm vs mole fraction of TNP.

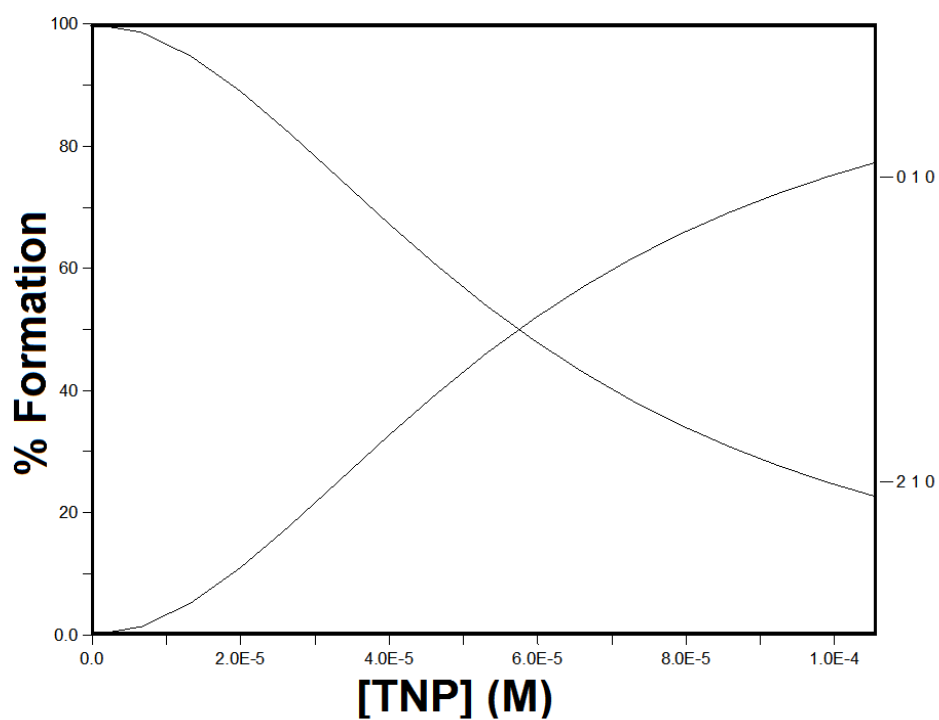

Fig. S25: Fitting diagram for the binding of complex 1 with TNP obtained using SPECIFIT software.



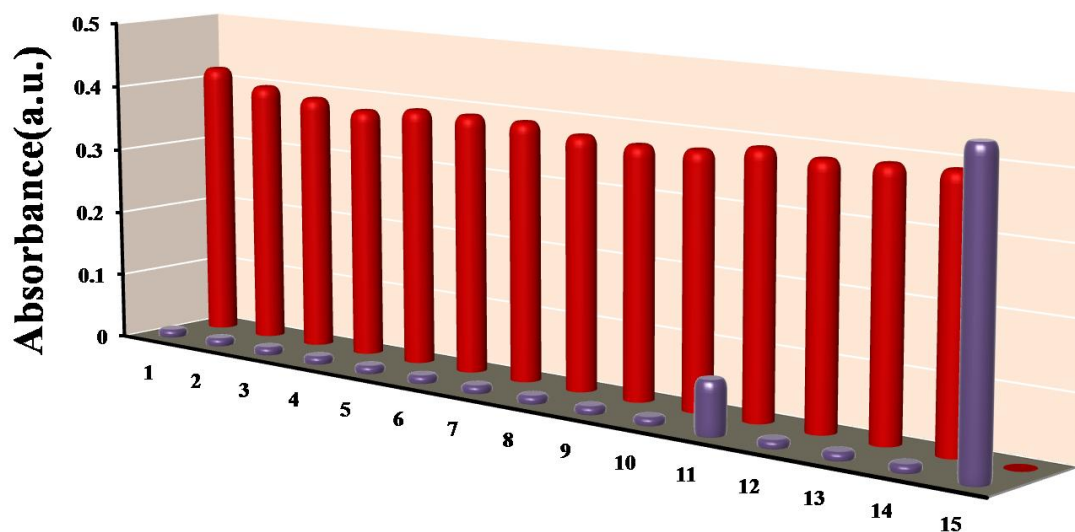

**Fig. S26:** Representative bar chart showing absorbance changes at  $\lambda_{\max}=425$  nm on the addition of various nitroaromatics (3eq. in  $\text{H}_2\text{O}$ ) (purple bars) and in the presence of TNP (red bars) in the solution of complex 1 ( $2.0 \times 10^{-5}$  M, DMF- $\text{H}_2\text{O}$ -acetonitrile, 0.5 : 0.5 : 9, v/v, HEPES buffer, pH 7.2). (1=none, 2=4-nitrobenzene, 3=1,3-dinitrobenzene, 4=4-nitrotoluene, 5= 2,4-dinitrotoluene, 6= 4-methoxyphenol (MP), 7=phenol, 8=4-nitrophenol (NP) 9= tributylammonium pyrophosphate (TBAPy), 10=2,4,6-trinitrotoluene (TNT), 11=DNP (2,6-dinitrophenol), 12=tetrabutylammonium acetate (TBAAc), 13=benzoic acid (BA), 14=tetrabutylammonium phosphate (TBAPo), 15=2,4,6-trinitrophenol (TNP))

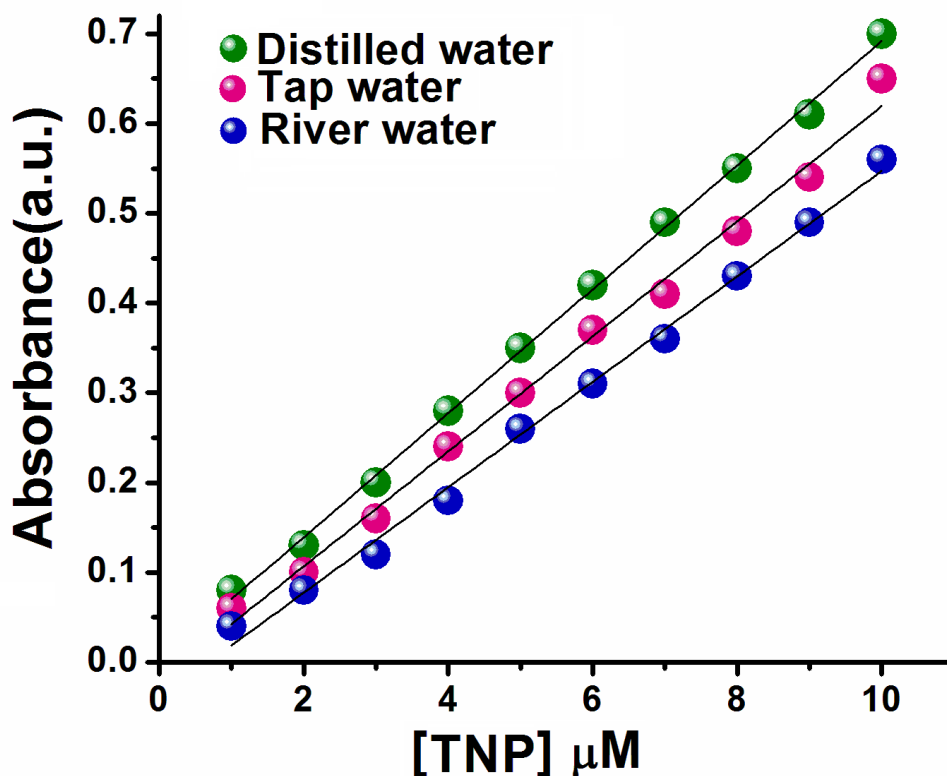

**Fig. S27:** Proof-of-concept experiments with complex 1 ( $1.0 \times 10^{-3}$  M, DMF- $\text{H}_2\text{O}$ -acetonitrile, 0.5 : 0.5 : 9, v/v, HEPES buffer, pH 7.2)  $\lambda_{\max}$  425 nm for determination of [TNP] ( $R^2=0.99$ ) in water samples.



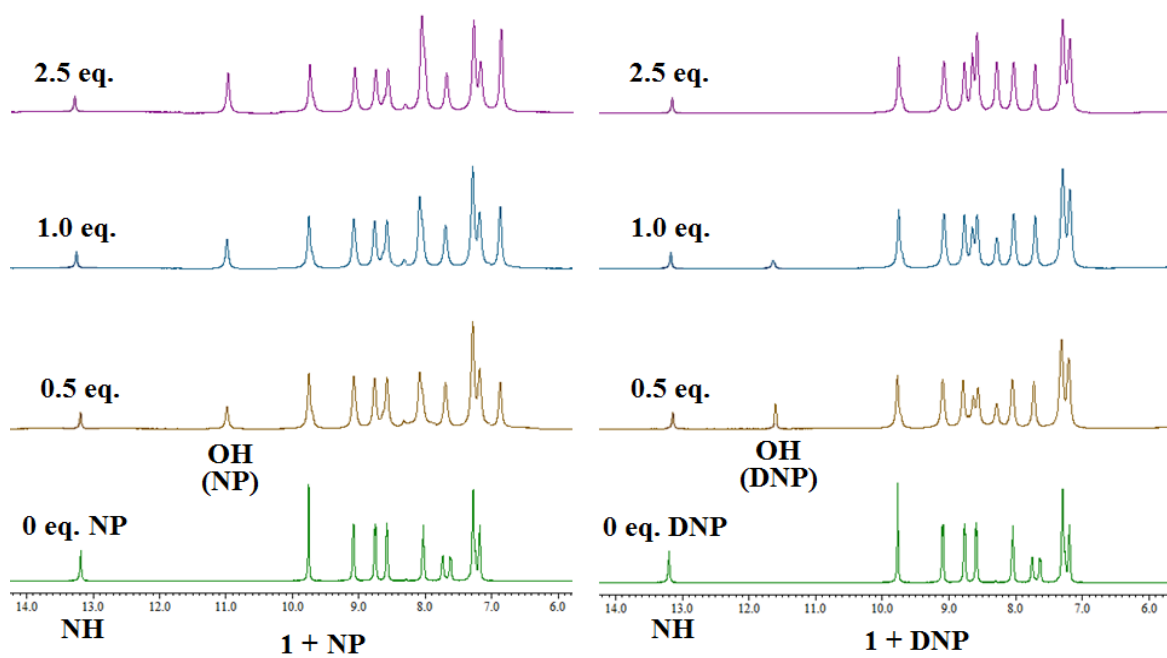

**Fig. S28:** Partial  $^1\text{H}$  NMR titrations of **1** with 4-nitrophenol (NP) and 2,4-dinitrophenol (DNP) recorded in  $\text{DMSO},d_6$  at room temperature.

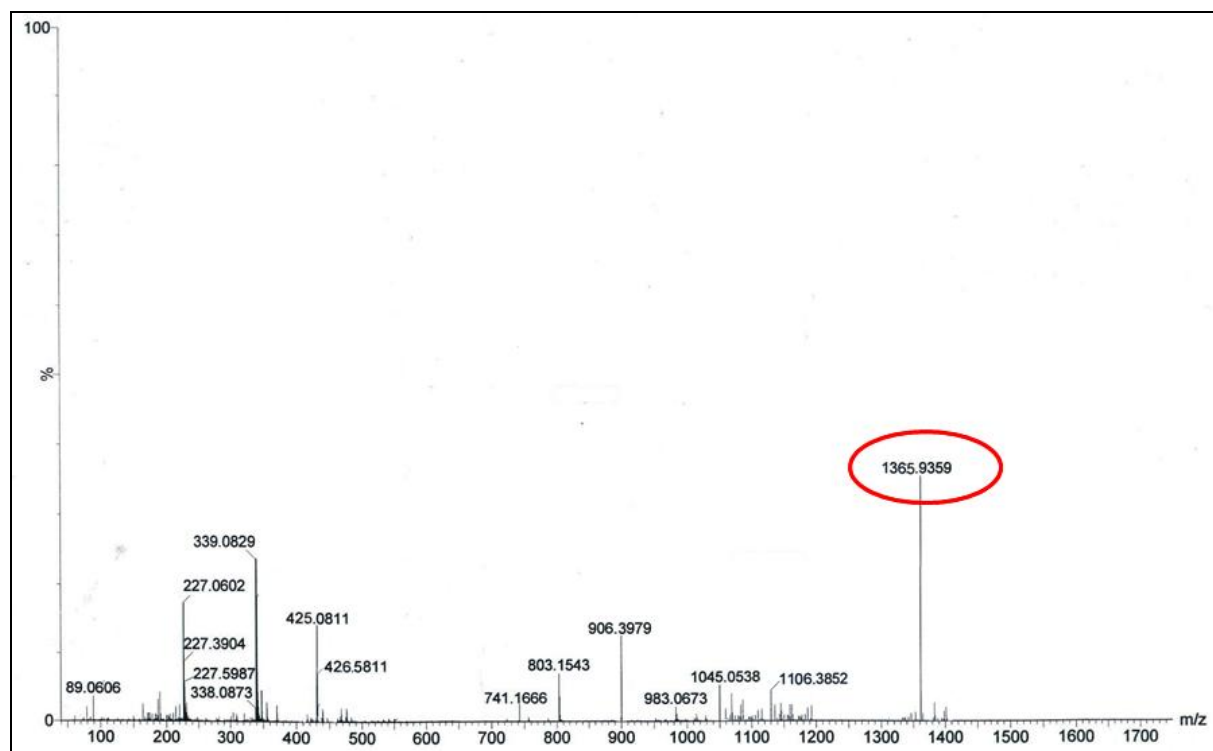

**Fig. S29:** HRMS of complex **1** + TNP.

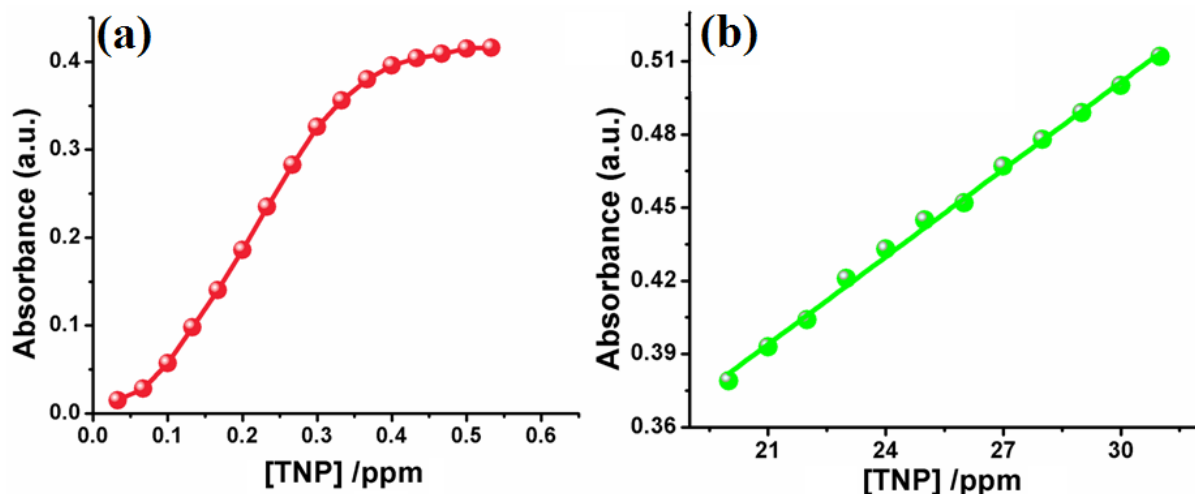

**Fig. S30:** The variation of absorbance of [TNP] in the presence (a) and absence (b) of complex 1 ( $2 \times 10^{-5}$  M, DMF-H<sub>2</sub>O-acetonitrile, 0.5 : 0.5 : 9, v/v, HEPES buffer, pH 7.2) at  $\lambda_{\max}$  425 nm.

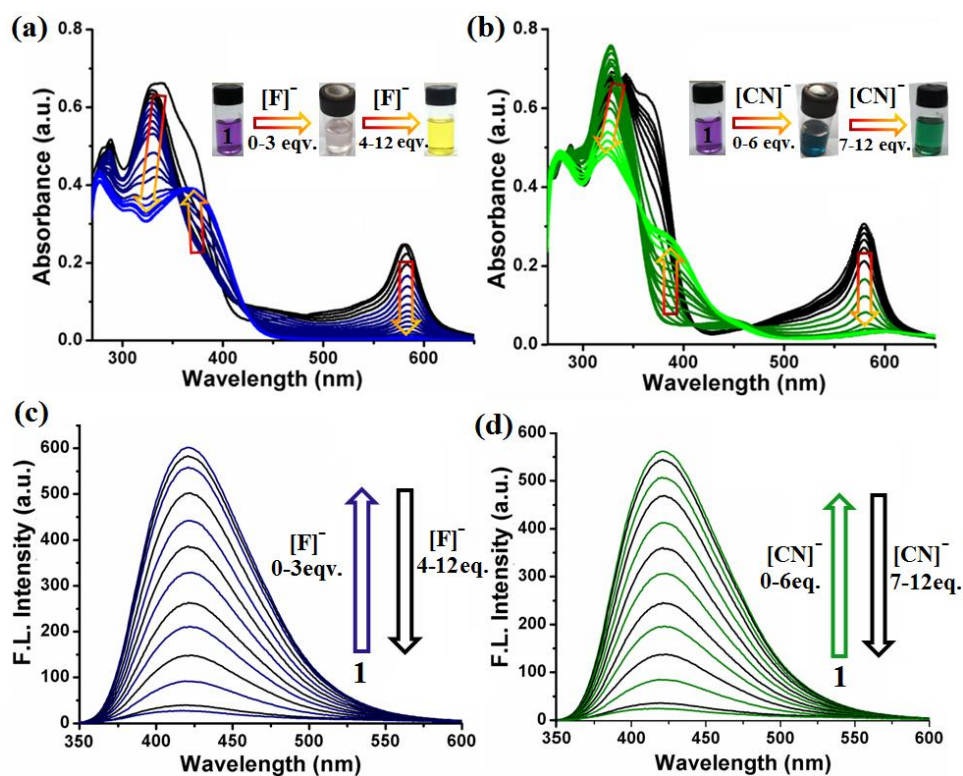

**Fig.S31:** Changes in absorbance and emission intensity of **1** ( $2.0 \times 10^{-5}$  M, DMF-H<sub>2</sub>O-acetonitrile, 0.5 : 0.5 : 9, v/v, HEPES buffer, pH 7.2) on addition of 12.0 equiv. of  $F^-$  (a,c) and  $CN^-$  (b,d) ions ( $1.0 \times 10^{-2}$  M in acetonitrile).

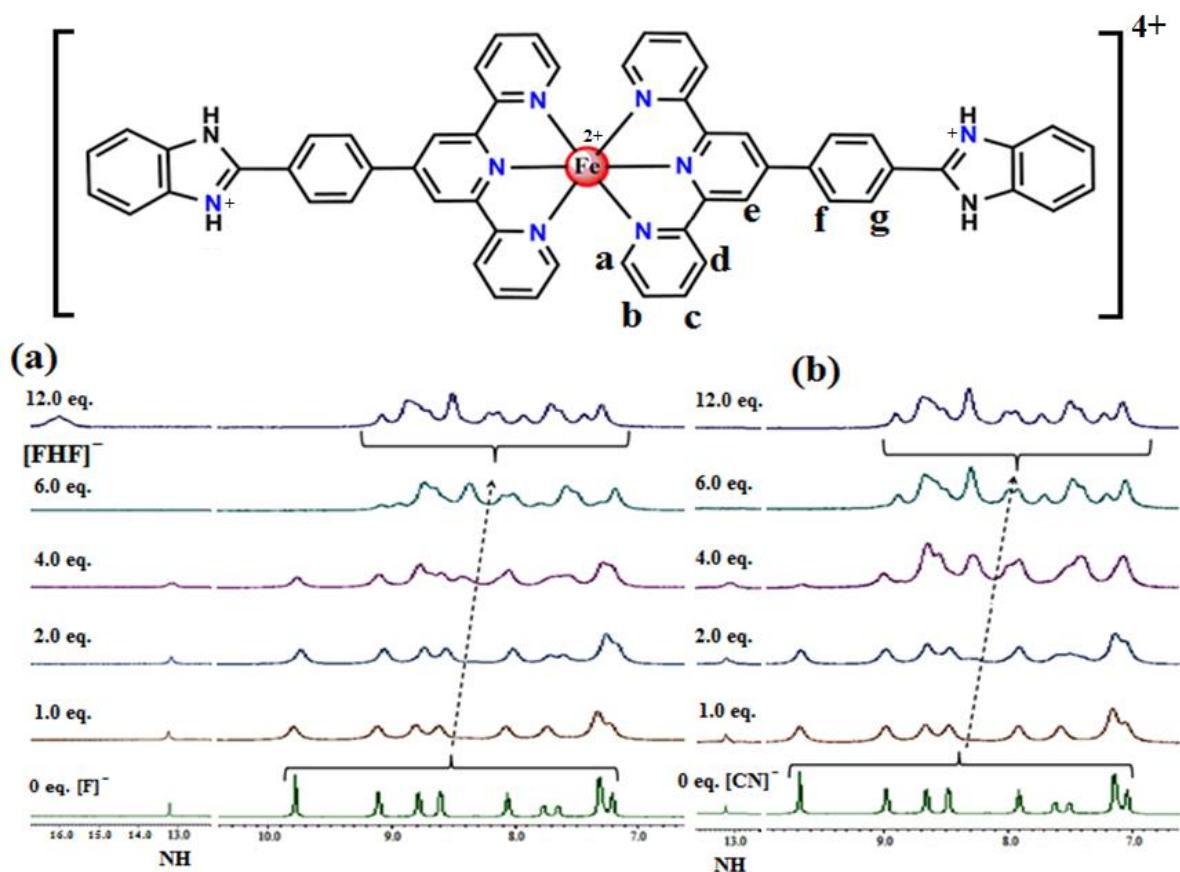

Fig. S32: Partial <sup>1</sup>H NMR titrations of **1** with F<sup>-</sup>(a) and CN<sup>-</sup>(b) ions recorded in DMSO,d<sub>6</sub> at room temperature.

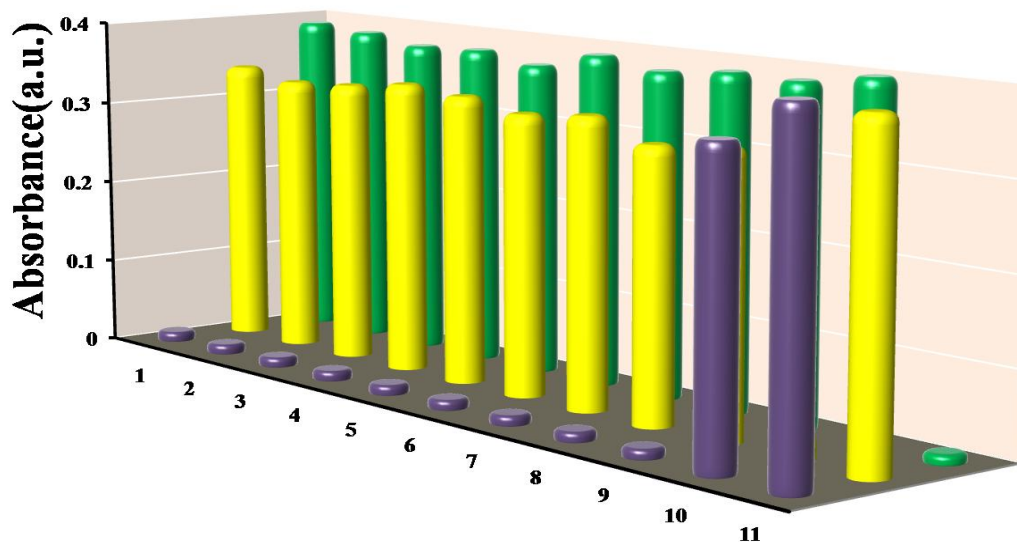

Fig. S33: Representative bar chart showing absorbance changes at  $\lambda_{\max}$ =380 nm on the addition of various anions (12eq. in a acetonitrile) (purple bars), in the presence of F<sup>-</sup> (yellow bars) and CN<sup>-</sup> (green bars) in the solution of complex **1** ( $2.0 \times 10^{-5}$ M in a acetonitrile). (1= none, 2= Cl<sup>-</sup>, 3= Br<sup>-</sup>, 4 = I<sup>-</sup>, 5 = HSO<sub>4</sub><sup>-</sup>, 6= AcO<sup>-</sup>, 7= ClO<sub>4</sub><sup>-</sup>, 8= HPO<sub>4</sub><sup>2-</sup>, 9 = NO<sub>3</sub><sup>-</sup>, 10= F<sup>-</sup>, 11=CN<sup>-</sup>).

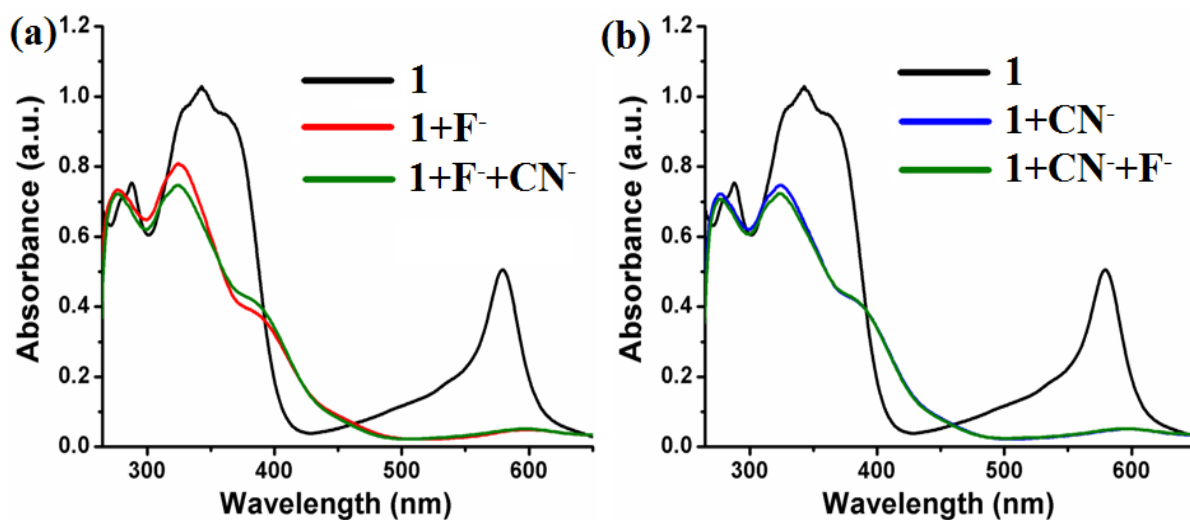

**Fig. S34:** Absorption spectra of **1** showing the changes in its absorbance in the presence of  $F^-$  followed by the addition of  $CN^-$  ions **(a)** and in the presence of  $CN^-$  followed by the addition of  $F^-$  ions **(b)**.

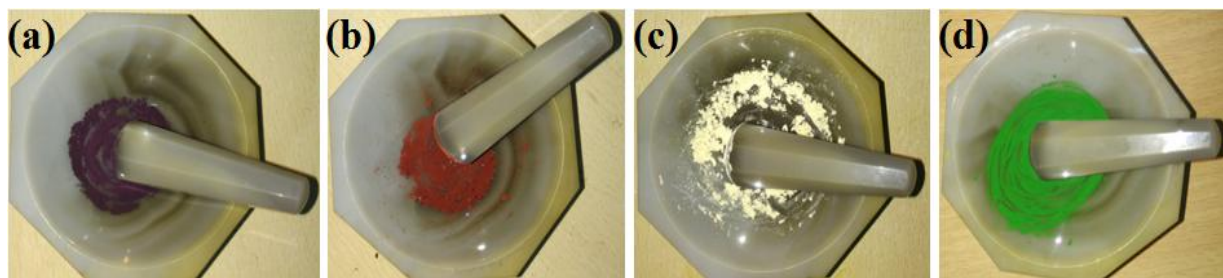

**Fig. S35:** Visual color changes upon mechanical grinding of complex **1** (a) separately with TNP (b),  $F^-$  (c) and  $CN^-$  (d) ions as their tetrabutyl ammonium salts.

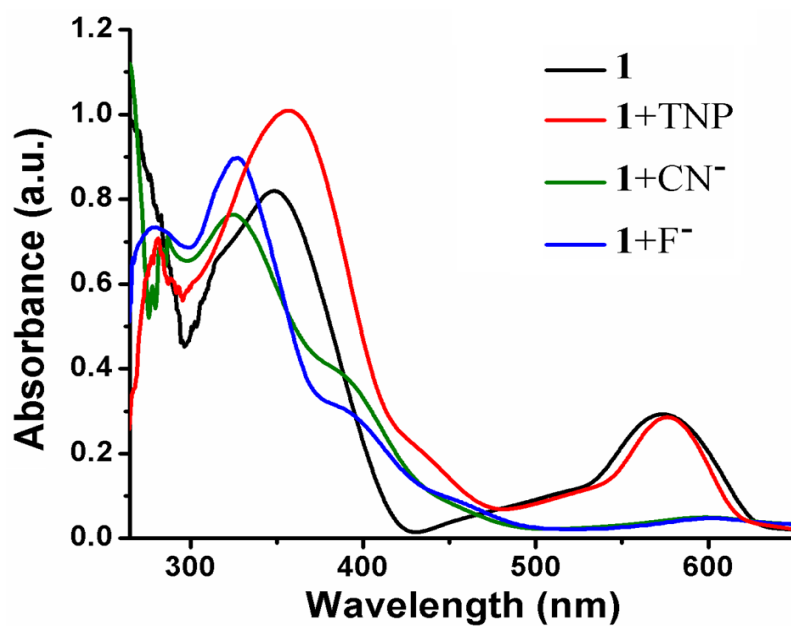

**Fig. S36:** Solid state UV-vis spectral changes recorded on the mechanical grinding of complex **1** separately with TNP, tetrabutyl ammonium salts of  $F^-$  and  $CN^-$  ions.

**Table S1.** Selected Crystallographic Data for **BIT**, complex **1** and complex **2**

| Parameters.                                   | BIT                                                           | Complex 1                                                                           | Complex 2                                                               |
|-----------------------------------------------|---------------------------------------------------------------|-------------------------------------------------------------------------------------|-------------------------------------------------------------------------|
| Formula.                                      | C <sub>28</sub> H <sub>25</sub> N <sub>5</sub> O <sub>3</sub> | C <sub>56</sub> H <sub>52</sub> Cl <sub>4</sub> FeN <sub>10</sub> O <sub>22.5</sub> | C <sub>72.5</sub> H <sub>53.5</sub> FeN <sub>18</sub> O <sub>21.5</sub> |
| M.                                            | 479.53                                                        | 1422.72                                                                             | 1576.68                                                                 |
| Crystal system.                               | Orthorhombic                                                  | Triclinic                                                                           | Triclinic                                                               |
| Temperature(°K)                               | 296                                                           | 273                                                                                 | 293                                                                     |
| Space group.                                  | <i>Pna2</i> <sub>1</sub>                                      | <i>P</i> -1                                                                         | <i>P</i> -1                                                             |
| a/Å                                           | 19.159(3)                                                     | 10.8611(5)                                                                          | 13.6844(5)                                                              |
| b/Å                                           | 4.1134(6)                                                     | 17.4221(8)                                                                          | 18.0033(7)                                                              |
| c/Å                                           | 30.426(5)                                                     | 18.0546(8)                                                                          | 28.3883(10)                                                             |
| α(°)                                          | (90)                                                          | 62.612(1)                                                                           | 101.503(1)                                                              |
| β(°)                                          | (90)                                                          | 81.047(1)                                                                           | 93.773(1)                                                               |
| γ(°)                                          | (90)                                                          | 85.646(1)                                                                           | 95.517(1)                                                               |
| V/Å <sup>3</sup>                              | 2397.8(6)                                                     | 2996.4(2)                                                                           | 6795.7(4)                                                               |
| Z                                             | 4                                                             | 2                                                                                   | 4                                                                       |
| D <sub>c</sub> , g cm <sup>-3</sup>           | 1.179                                                         | 1.577                                                                               | 1.541                                                                   |
| Reflns.collected/Unique                       | 11917/3883                                                    | 46277/14978                                                                         | 107375/26653                                                            |
| Data/restraints/Parameters.                   | 3883/1/325                                                    | 14978/26/897                                                                        | 266531/145/19737                                                        |
| R(int)                                        | 0.0304                                                        | 0.0434                                                                              | 0.0464                                                                  |
| Limiting indices                              | -23<=h(<=23<br>-4<=k<=2<br>-36<=l<=29                         | -14<=h<=14<br>-23<=k<=23<br>-24<=l<=24                                              | -18<=h<=18<br>-23<=k<=23<br>-37<=l<=37                                  |
| θrange for data collection(°)                 | 2.48-25.21                                                    | 2.217-28.377                                                                        | 2.253-26.000                                                            |
| Completeness to θ=25.00                       | 99.9                                                          | 99.9                                                                                | 99.9                                                                    |
| Refinement method                             | Full-matrix, least-squares on F <sup>2</sup>                  | Full-matrix, least-squares on F <sup>2</sup>                                        | Full-matrix, least-squares on F <sup>2</sup>                            |
| Final R indices [I>2σ(I)]                     | R <sub>1</sub> = 0.0415<br>wR <sub>2</sub> =0.1091            | R <sub>1</sub> = 0.0681<br>wR <sub>2</sub> =0.1639                                  | R <sub>1</sub> = 0.0682<br>wR <sub>2</sub> =0.1755                      |
| R indices(all data)                           | R <sub>1</sub> =0.0638<br>wR <sub>2</sub> =0.1196             | R <sub>1</sub> =0.0977<br>wR <sub>2</sub> =0.1809                                   | R <sub>1</sub> =0.0911<br>wR <sub>2</sub> =0.1961                       |
| GoF                                           | 1.024                                                         | 1.022                                                                               | 1.035                                                                   |
| Residual electron density<br>e/Å <sup>3</sup> | 0.167,-0.155                                                  | 1,586, -1.798                                                                       | 1.317, -1.073                                                           |

**Table S2.** Dimensions in the coordination spheres of complexes **1** and **2**

| Bond lengths(Å) |            |            |            |
|-----------------|------------|------------|------------|
|                 | 1          | 2A         | 2B         |
| Fe-N11          | 1.979(3)   | 1.976(3)   | 1.982(3)   |
| Fe-N22          | 1.877(2)   | 1.876(3)   | 1.872(3)   |
| Fe-N28          | 1.961(3)   | 1.983(3)   | 1.978(3)   |
| Fe-N51          | 1.964(3)   | 1.967(3)   | 1.973(3)   |
| Fe-N62          | 1.876(2)   | 1.875(3)   | 1.878(3)   |
| Fe-N68          | 1.970(3)   | 1.972(3)   | 1.969(3)   |
| Bond Angles(°)  |            |            |            |
| N62-Fe-N22      | 177.75(11) | 178.40(11) | 179.48(12) |
| N62-Fe-N28      | 100.25(11) | 97.68(11)  | 98.62(11)  |

|            |            |             |            |
|------------|------------|-------------|------------|
| N22-Fe-N28 | 80.96(11)  | 80.90(11)   | 80.86(11)  |
| N62-Fe-N51 | 80.75(11)  | 80.97(10)   | 80.78(11)  |
| N22-Fe-N51 | 101.19(11) | 98.25(11)   | 99.19(11)  |
| N28-Fe-N51 | 89.80(11)  | 88.8997(11) | 93.72(11)  |
| N62-Fe-N68 | 81.28(11)  | 80.49(11)   | 81.05(11)  |
| N22-Fe-N68 | 96.82(11)  | 100.29(11)  | 98.99(11)  |
| N28-Fe-N68 | 91.40(11)  | 93.79(10)   | 90.59(12)  |
| N51-Fe-N68 | 161.91(11) | 161.46(11)  | 161.76(11) |
| N62-Fe-N11 | 97.73(11)  | 101.03(11)  | 99.69(11)  |
| N22-Fe-N11 | 81.07(11)  | 80.37(11)   | 80.82(11)  |
| N28-Fe-N11 | 162.02(11) | 161.21(11)  | 161.69(11) |
| N51-Fe-N11 | 93.23(11)  | 92.28(11)   | 89.23(11)  |
| N68-Fe-N11 | 91.18(11)  | 90.90(11)   | 92.23(11)  |

**Table S3**Hydrogen bond dimensions (A, deg) in **BIT**, **1** and **2**

| BIT                                  |         |          |           |         |                     |
|--------------------------------------|---------|----------|-----------|---------|---------------------|
| D-H...A<br>( D= donor, A = acceptor) | D-H     | H...O    | D...A     | D-H...A | symmetry<br>element |
| N43-H43 O1W                          | 0.83(2) | 2.09(3)  | 2.917(6)  | 170(4)  |                     |
| O1W-H1W...O3W                        | 0.85(3) | 2.63(4)  | 3.050(9)  | 112(3)  | x+1/2, -y-1/2, z    |
| O2W-H21W...N11                       | 0.85(3) | 2.02(5)  | 2.833(7)  | 161(12) |                     |
| O2W- H22W...O3W                      | 0.84(3) | 2.63(13) | 2.855(11) | 97(9)   | x+1/2, -y+1/2, z    |
| O3W- H32W...O2W                      | 0.89    | 2.14     | 2.855(11) | 137     | x-1/2, -y+1/2, z    |
| Complex 1                            |         |          |           |         |                     |
| N36-H36...O3W                        | 0.86    | 1.79     | 2.644(4)  | 173     |                     |
| N43- H43...O2W                       | 0.86    | 1.98     | 2.820(4)  | 164     |                     |
| N83- H83...O1W                       | 0.86    | 1.91     | 2.749(4)  | 165     |                     |
| N76- H76...O4W                       | 0.86    | 2.10     | 2.865(6)  | 149     |                     |
| O1W- H11W...O2W                      | 0.83    | 2.04     | 2.858(4)  | 171     | 1-x, 1-y, -z        |
| O2W- H21W...O31                      | 0.85    | 2.14     | 2.900(4)  | 149     | 1+x,y,z             |
| O2W- H22W...O23                      | 0.86    | 1.89     | 2.723(7)  | 163     | 1-x, 1-y, 1-z       |
| O2W- H22W...O28                      | 0.86    | 1.95     | 2.777(14) | 159     | 1-x, 1-y, 1-z       |
| O3W- H32W...O33                      | 0.85    | 2.57     | 3.160(5)  | 128     | 1-x, -y, 1-z        |
| O3W- H32W...O34                      | 0.85    | 2.06     | 2.869(4)  | 159     | 1-x, -y, 1-z        |
| O4W- H41W...O5W                      | 0.94    | 1.75     | 2.681(9)  | 172     | x, y, -1+z          |
| O5W- H51W...O13                      | 0.82    | 2.49     | 3.191(9)  | 144     |                     |
| O6W-H61W...O41                       | 0.82    | 2.02     | 2.787(6)  | 155     |                     |
| O6W-H62W...O22                       | 0.83    | 2.02     | 2.839(6)  | 172     |                     |
| O6W-H62W...O27                       | 0.83    | 2.41     | 3.196(11) | 159     |                     |
| Complex 2                            |         |          |           |         |                     |
| N36A-H36A...O92D                     | 0.88    | 2.03     | 2.901(5)  | 171     | 2-x, -y, 1-z        |
| N76A-H76A...O2W                      | 0.88    | 1.92     | 2.768(4)  | 161     |                     |
| N36B-H36B...O3W                      | 0.88    | 1.97     | 2.736(5)  | 147     |                     |
| N76B-H76B...O1W                      | 0.88    | 2.01     | 2.889(6)  | 176     |                     |
| N76B-H76B...O4W                      | 0.88    | 1.99     | 2.766(9)  | 146     |                     |
| O2W-H2W1...O91E                      | 0.87    | 1.93     | 2.792(4)  | 168     | 2-x, 1-y, 2-z       |
| O2W-H2W2...O92C                      | 0.87    | 2.26     | 2.998(5)  | 143     | 1-x, 1-y, 2-z       |

<sup>a</sup> There were close contacts between other solvent water molecules but as their hydrogen atoms could not be located, they are not listed here.

**TableS3:** Data of SPECFIT for calculation of binding constant of **BIT** with  $\text{Fe}^{2+}$  at  $\lambda_{\text{max}}$  579nm.

```

When [Fe2+]: [BIT] = 1:2
[PROGRAM]
Name = SPECFIT
Version = 3.0

[FILE]
Name = BIT+FE2+.FAC
Path = C:\Program Files\SPECFIT\DATA\
Date = 26-Aug-07
Time = 8:43:42 PM
Ncomp = 2
Nmeas = 16
Nwave = 761

[FACTOR ANALYSIS]
Tolerance = 1.000E-09
Max.Factors = 10
Num.Factors = 8
Significant = 4
Eigen Noise = 4.837E-04
Exp't Noise = 4.837E-04
# Eigenvalue Square Sum Residual Prediction
1 1.486E+03 9.105E+01 8.648E-02 Data Vector
2 9.079E+01 2.621E-01 4.640E-03 Data Vector
3 1.805E-01 8.163E-02 2.590E-03 Data Vector
4 7.878E-02 2.848E-03 4.837E-04 Data Vector
5 1.240E-03 1.608E-03 3.635E-04 Possibly Data
6 2.796E-04 1.328E-03 3.304E-04 Probably Noise
7 2.075E-04 1.121E-03 3.035E-04 Probably Noise
8 1.660E-04 9.548E-04 2.801E-04 Probably Noise

[MODEL]
Date = 26-Aug-07
Time = 8:44:04 PM
Model = 0
Index = 3
Function = 1
Species = 3
Params = 3

[SPECIES]      [COLORED]      [FIXED]      [SPECTRUM]
1 0 0          False         False
0 1 0          True          False
1 2 0          True          False

[SPECIES]      [FIXED]      [PARAMETER]      [ERROR]
1 0 0          True         0.00000E+00 +/- 0.00000E+00
0 1 0          True         0.00000E+00 +/- 0.00000E+00
1 2 0          False        8.89448E+00 +/- 5.06828E-01

```

[CONVERGENCE]  
Iterations = 6  
Convergence Limit = 1.000E-04  
Convergence Found = 2.223E-05  
Marquardt Parameter = 0.0  
Sum(Y-y)^2 Residuals = 3.48348E+00  
Std. Deviation of Fit(Y) = 1.69150E-02

[STATISTICS]  
Experimental Noise = 4.837E-04  
Relative Error Of Fit = 4.7046%  
Durbin-Watson Factor = 0.4200  
Goodness Of Fit, Chi^2 = 1.223E+03  
Durbin-Watson Factor (raw data) = None  
Goodness Of Fit, Chi^2 (raw data) = None

[COVARIANCE]  
4.895E+00

[CORRELATION]  
1.000E+00

[END FILE]

**TableS4:** Data of SPECFIT for calculation of binding constant of BIT with F<sup>-</sup> at  $\lambda_{\max}$  381nm.

[F]:BIT=1:1  
[PROGRAM]  
Name = SPECFIT  
Version = 3.0  
  
[FILE]  
Name = BIT+F-.FAC  
Path = C:\Program Files\SPECFIT\DATA\  
Date = 26-Aug-07  
Time = 8:55:18 PM  
Ncomp = 2  
Nmeas = 18  
Nwave = 377  
  
[FACTOR ANALYSIS]  
Tolerance = 1.000E-09  
Max.Factors = 10  
Num.Factors = 8  
Significant = 4  
Eigen Noise = 6.247E-04  
Exp't Noise = 6.247E-04



| # | Eigenvalue | Square Sum | Residual  | Prediction     |
|---|------------|------------|-----------|----------------|
| 1 | 8.826E+02  | 4.075E+01  | 7.749E-02 | Data Vector    |
| 2 | 4.071E+01  | 3.474E-02  | 2.263E-03 | Data Vector    |
| 3 | 2.838E-02  | 6.363E-03  | 9.686E-04 | Data Vector    |
| 4 | 3.717E-03  | 2.646E-03  | 6.247E-04 | Data Vector    |
| 5 | 9.044E-04  | 1.742E-03  | 5.068E-04 | Possibly Data  |
| 6 | 4.292E-04  | 1.313E-03  | 4.400E-04 | Probably Noise |
| 7 | 2.587E-04  | 1.054E-03  | 3.943E-04 | Probably Noise |
| 8 | 1.667E-04  | 8.873E-04  | 3.618E-04 | Probably Noise |

[MODEL]

Date = 26-Aug-07  
Time = 8:55:43 PM  
Model = 0  
Index = 3  
Function = 1  
Species = 3  
Params = 3

| [SPECIES] | [COLORED] | [FIXED] | [SPECTRUM] |
|-----------|-----------|---------|------------|
| 1 0 0     | False     | False   | False      |
| 0 1 0     | True      | False   | False      |
| 1 1 0     | True      | False   | False      |

| [SPECIES] | [FIXED] | [PARAMETER]     | [ERROR]     |
|-----------|---------|-----------------|-------------|
| 1 0 0     | True    | 0.00000E+00 +/- | 0.00000E+00 |
| 0 1 0     | True    | 0.00000E+00 +/- | 0.00000E+00 |
| 1 1 0     | False   | 4.08395E+00 +/- | 3.37167E-02 |

[CONVERGENCE]

Iterations = 6  
Convergence Limit = 1.000E-04  
Convergence Found = 1.106E-06  
Marquardt Parameter = 0.0  
Sum(Y-y)^2 Residuals = 2.17449E-01  
Std. Deviation of Fit(Y) = 5.66114E-03

[STATISTICS]

Experimental Noise = 6.247E-04  
Relative Error Of Fit = 1.5348%  
Durbin-Watson Factor = 1.0779  
Goodness Of Fit, Chi^2 = 8.214E+01  
Durbin-Watson Factor (raw data) = None  
Goodness Of Fit, Chi^2 (raw data) = None

[COVARIANCE]

6.517E-03

[CORRELATION]

1.000E+00

[END FILE]

**Table S5:** Data of SPECFIT for calculation of binding constant of BIT with CN<sup>-</sup> at  $\lambda_{\text{max}}$  383nm.

[CN<sup>-</sup>]:BIT]=1:1

[PROGRAM]

Name = SPECFIT

Version = 3.0

[FILE]

Name = BIT+CN-.FAC

Path = C:\Program Files\SPECFIT\DATA\

Date = 26-Aug-07

Time = 8:52:04 PM

Ncomp = 2

Nmeas = 17

Nwave = 377

[FACTOR ANALYSIS]

Tolerance = 1.000E-09

Max.Factors = 10

Num.Factors = 5

Significant = 3

Eigen Noise = 9.985E-04

Exp't Noise = 9.985E-04

| # | Eigenvalue | Square Sum | Residual  | Prediction     |
|---|------------|------------|-----------|----------------|
| 1 | 8.371E+02  | 3.376E+01  | 7.258E-02 | Data Vector    |
| 2 | 3.373E+01  | 2.763E-02  | 2.077E-03 | Data Vector    |
| 3 | 2.124E-02  | 6.387E-03  | 9.985E-04 | Data Vector    |
| 4 | 3.997E-03  | 2.391E-03  | 6.110E-04 | Possibly Data  |
| 5 | 6.470E-04  | 1.744E-03  | 5.218E-04 | Probably Noise |

[MODEL]

Date = 26-Aug-07

Time = 8:52:19 PM

Model = 0

Index = 3

Function = 1

Species = 3

Params = 3

| [SPECIES] | [COLORED] | [FIXED] | [SPECTRUM] |
|-----------|-----------|---------|------------|
|-----------|-----------|---------|------------|

|       |      |       |  |
|-------|------|-------|--|
| 1 0 0 | True | False |  |
|-------|------|-------|--|

|       |      |       |  |
|-------|------|-------|--|
| 0 1 0 | True | False |  |
|-------|------|-------|--|

|       |      |       |  |
|-------|------|-------|--|
| 1 1 0 | True | False |  |
|-------|------|-------|--|

| [SPECIES] | [FIXED] | [PARAMETER] | [ERROR] |
|-----------|---------|-------------|---------|
|-----------|---------|-------------|---------|

|       |      |                 |             |
|-------|------|-----------------|-------------|
| 1 0 0 | True | 0.00000E+00 +/- | 0.00000E+00 |
|-------|------|-----------------|-------------|

|       |      |                 |             |
|-------|------|-----------------|-------------|
| 0 1 0 | True | 0.00000E+00 +/- | 0.00000E+00 |
|-------|------|-----------------|-------------|

|       |       |                 |             |
|-------|-------|-----------------|-------------|
| 1 1 0 | False | 5.65745E+00 +/- | 1.98385E-01 |
|-------|-------|-----------------|-------------|

[CONVERGENCE]

Iterations = 11

Convergence Limit = 1.000E-04  
 Convergence Found = 2.235E-05  
 Marquardt Parameter = 0.0  
 Sum(Y-y)^2 Residuals = 4.01996E-01  
 Std. Deviation of Fit(Y) = 7.92044E-03

[STATISTICS]

Experimental Noise = 9.985E-04  
 Relative Error Of Fit = 2.1490%  
 Durbin-Watson Factor = 1.5689  
 Goodness Of Fit, Chi^2 = 6.292E+01  
 Durbin-Watson Factor (raw data) = None  
 Goodness Of Fit, Chi^2 (raw data) = None

[COVARIANCE]

3.353E-01

[CORRELATION]

1.000E+00

[END FILE]

**TableS6** Selected UV-vis absorption energy transitions at the TD-DFT/B3LYP level for **BIT**, **[BIT+F]<sup>-</sup>**, **[BIT+CN]<sup>-</sup>** and **[Fe(BIT)<sub>2</sub>]<sup>2+</sup>**.in acetonitrile.

| Excited state                             | $\lambda_{\text{ex}}(\text{nm}) / (\text{eV})$ | Oscillator strength(f) | $\lambda_{\text{exp}}(\text{nm}) / \epsilon_{\text{exp}}(\text{M}^{-1}\text{cm}^{-1})$ | Key transitions                                                             |
|-------------------------------------------|------------------------------------------------|------------------------|----------------------------------------------------------------------------------------|-----------------------------------------------------------------------------|
| <b>BIT</b>                                |                                                |                        |                                                                                        |                                                                             |
| S <sub>9</sub>                            | 325/3.8125                                     | 0.0404                 | 326/89700                                                                              | H-4→L+1(2%), H-2→L(37%), H→L+1(58%)                                         |
| S <sub>15</sub>                           | 287/4.3129                                     | 0.3021                 | 287/58500                                                                              | H-5→L(4%), H-5→L+2(2%), H-2→L(44%), H-2→L+1(16%), H→L+2(29%),               |
| <b>[BIT+F]<sup>-</sup></b>                |                                                |                        |                                                                                        |                                                                             |
| S <sub>5</sub>                            | 369/3.3550                                     | 0.9281                 | 375/45000                                                                              | H→L(56%) H-2→L+1(43%)                                                       |
| S <sub>19</sub>                           | 268/4.6230                                     | 0.4612                 | 276/58200                                                                              | H-13→L(2%), H-6→L+1(9%), H-3→L+1(56%), H-2→L+2(7%), H-2→L+3(6%), H→L+4(14%) |
| <b>[BIT+CN]<sup>-</sup></b>               |                                                |                        |                                                                                        |                                                                             |
| S <sub>7</sub>                            | 381/3.2478                                     | 0.8103                 | 390/43000                                                                              | H-1→L(87%), H→L(12%)                                                        |
| S <sub>25</sub>                           | 269/4.5979                                     | 0.2501                 | 275/58000                                                                              | H-2→L+1(3%), H-1→L+2(2%), H→L+2(36%), H-2→L+5(54%)                          |
| <b>[Fe(BIT)<sub>2</sub>]<sup>2+</sup></b> |                                                |                        |                                                                                        |                                                                             |
| S <sub>9</sub>                            | 573/2.5324                                     | 0.0079                 | 579/40900                                                                              | H-2→L(15%), H-2→L+1(2%), H→L+1(72%)                                         |
| S <sub>64</sub>                           | 343/3.6091                                     | 0.3629                 | 344/82000                                                                              | H-4→L+4(2%), H-3→L+5(3%), H-1→L+4(43%), H→L+5(45%)                          |

**Tables7:** Data of SPECFIT for calculation of binding constant of complex **1** with TNP at  $\lambda_{\max}$  425nm

```

[TNP] :[Complex 1]=2:1
[PROGRAM]
Name = SPECFIT
Version = 3.0

[FILE]
Name = COMPLEX1+TNP NEW.FAC
Path = C:\Program Files\SPECFIT\DATA\
Date = 26-Aug-07
Time = 8:59:30 PM
Ncomp = 2
Nmeas = 17
Nwave = 761

[FACTOR ANALYSIS]
Tolerance = 1.000E-09
Max.Factors = 10
Num.Factors = 7
Significant = 4
Eigen Noise = 4.488E-04
Exp't Noise = 4.488E-04
# Eigenvalue Square Sum Residual Prediction
1 3.076E+03 5.958E+01 6.787E-02 Data Vector
2 5.906E+01 5.185E-01 6.331E-03 Data Vector
3 3.727E-01 1.458E-01 3.357E-03 Data Vector
4 1.432E-01 2.605E-03 4.488E-04 Data Vector
5 8.228E-04 1.782E-03 3.712E-04 Probably Noise
6 2.714E-04 1.511E-03 3.418E-04 Probably Noise
7 2.114E-04 1.299E-03 3.170E-04 Probably Noise

[MODEL]
Date = 26-Aug-07
Time = 8:59:56 PM
Model = 0
Index = 3
Function = 1
Species = 3
Params = 3

[SPECIES]      [COLORED]      [FIXED]      [SPECTRUM]
1 0 0          False          False
0 1 0          True           False
2 1 0          True           False

[SPECIES]      [FIXED]      [PARAMETER]      [ERROR]
1 0 0          True         0.00000E+00 +/- 0.00000E+00
0 1 0          True         0.00000E+00 +/- 0.00000E+00
2 1 0          False        8.51229E+00 +/- 2.43517E-01
    
```

[CONVERGENCE]  
 Iterations = 5  
 Convergence Limit = 1.000E-04  
 Convergence Found = 2.926E-05  
 Marquardt Parameter = 0.0  
 Sum(Y-y)<sup>2</sup> Residuals = 5.95728E+01  
 Std. Deviation of Fit(Y) = 6.78616E-02

[STATISTICS]  
 Experimental Noise = 4.488E-04  
 Relative Error Of Fit = 13.9156%  
 Durbin-Watson Factor = 1.9261  
 Goodness Of Fit, Chi<sup>2</sup> = 2.286E+04  
 Durbin-Watson Factor (raw data) = None  
 Goodness Of Fit, Chi<sup>2</sup> (raw data) = None

[COVARIANCE]  
 5.654E-01

[CORRELATION]  
 1.000E+00

[END FILE]

**Table S8:** Recovery data of TNP in real sample by complex 1.

| S.N. | Samples         | TNP added<br>( $\mu\text{M}$ ) | TNP found<br>( $\mu\text{M}$ ) | % Recovery |
|------|-----------------|--------------------------------|--------------------------------|------------|
| 1.   | Distilled Water | 0                              | 0                              | -          |
|      |                 | 2                              | 1.96                           | 98%        |
|      |                 | 4                              | 3.94                           | 98.5%      |
|      |                 | 6                              | 5.89                           | 98.16%     |
| 2.   | Tap water       | 0                              | 0                              | -          |
|      |                 | 2                              | 1.82                           | 91%        |
|      |                 | 4                              | 3.79                           | 94.75%     |
|      |                 | 6                              | 5.86                           | 97.66%     |
| 3.   | River water     | 0                              | 0                              | -          |
|      |                 | 2                              | 1.85                           | 92.5%      |
|      |                 | 4                              | 3.98                           | 99.5%      |
|      |                 | 6                              | 5.87                           | 97.83%     |

**Table S9:** Binding constants and detection limits of BIT and complex 1 in the presence of different analytes.

| Receptors | Analytes         | Binding Constant<br>(log $\beta$ ) | Detection limits |                               |
|-----------|------------------|------------------------------------|------------------|-------------------------------|
|           |                  |                                    | (ppm)            | Concentration (M)             |
| BIT       | Fe <sup>2+</sup> | 8.89 $\pm$ 0.50                    | 0.42             | 4.2 $\times$ 10 <sup>-7</sup> |
|           | F <sup>-</sup>   | 4.08 $\pm$ 0.03                    | 5.9              | 5.9 $\times$ 10 <sup>-6</sup> |
|           | CN <sup>-</sup>  | 5.65 $\pm$ 0.19                    | 7.2              | 7.2 $\times$ 10 <sup>-6</sup> |
| Complex 1 | TNP              | 8.51 $\pm$ 0.24                    | 0.14             | 1.4 $\times$ 10 <sup>-7</sup> |
